# Supplementary material for: Exome chip analyses in adult attention deficit hyperactivity disorder
Source: PubMed Central journal article supplement (PMC5315553; doi:10.1038/tp.2016.196), 2016-10-18

```

:: * . :
lcl|Query_37229 MAQHFLAACDVGFDLHTLRYNLPESAPLIYNSFAQFLVKEKGYDKELLNVTPEWDFCCKGLALDLEDGNFLKLAN 80
gi|114608985 MAQHFLAACDVGFDLHTLRYNLPESAPLIYNSFAQFLVKEKGYDKELLNVTPEWDFCCKGLALDLEDGNFLKLAN 80
gi|426354317 MAQHFLAACDVGFDLHTLRYNLPESAPLIYNSFAQFLVKEKGYDKELLNVTPEWDFCCKGLALDLEDGNFLKLAN 80
gi|795513538 MAQHFLAACDVGFDLHTLRYNLPESAPLIYNSFAQFLVKEKGYDKELLNVTPEWDFCCKGLALDLEDGNFLKLAN 80
gi|387763464 MAQHFLAACDVGFDLHTLRYNLPESAPLIYNSFAQFLVKEKGYDKELLNVTPEWDFCCKGLALDLEDGNFLKLAN 80
gi|795549508 MAQHFLAACDVGFDLHTLRYNLPESAPLIYNSFAQFLVKEKGYDKELLNVTPEWDFCCKGLALDLEDGNFLKLAN 80
gi|795513542 MAQHFLAACDVGFDLHTLRYNLPESAPLIYNSFAQFLVKEKGYDKELLNVTPEWDFCCKGLALDLEDGNFLKLAN 80
gi|544424790 MAQHFLAACDVGFDLHTLRYNLPESAPLIYNSFAQFLVKEKGYDKELLNVTPEWDFCCKGLALDLEDGNFLKLAN 80
gi|724807254 MAQHFLAACDVGFDLHTLRYNLPESAPLIYNSFAQFLVKEKGYDKELLNVTPEWDFCCKGLALDLEDGNFLKLAN 80
gi|795130302 MAQHFLAACDVGFDLHTLRYNLPESAPLIYNSFAQFLVKEKGYDKELLNVTPEWDFCCKGLALDLEDGNFLKLAN 80
gi|817291021 MAQHFLAACDVGFDLHTLRYNLPESAPLIYNSFAQFLVKEKGYDKELLNVTPEWDFCCKGLALDLEDGNFLKLAN 80
gi|296199057 MAQHFLAACDVGFDLHTLRYNLPESAPLIYNSFAQFLVKEKGYDKELLNVTPEWDFCCKGLALDLEDGNFLKLAN 80
gi|724807257 MAQHFLAACDVGFDLHTLRYNLPESAPLIYNSFAQFLVKEKGYDKELLNVTPEWDFCCKGLALDLEDGNFLKLAN 80
gi|403295527 MAQHFLAACDVGFDLHTLRYNLPESAPLIYNSFAQFLVKEKGYDKELLNVTPEWDFCCKGLALDLEDGNFLKLAN 80
gi|817291023 MAQHFLAACDVGFDLHTLRYNLPESAPLIYNSFAQFLVKEKGYDKELLNVTPEWDFCCKGLALDLEDGNFLKLAN 80
gi|675654011 MAQHFLAACDVGFDLHTLRYNLPESAPLIYNSFAQFLVKEKGYDKELLNVTPEWDFCCKGLALDLEDGNFLKLAN 80
gi|725594041 MAQHFLAACDVGFDLHTLRYNLPESAPLIYNSFAQFLVKEKGYDKELLNVTPEWDFCCKGLALDLEDGNFLKLAN 80
gi|829988711 MAQHFLAACDVGFDLHTLRYNLPESAPLIYNSFAQFLVKEKGYDKELLNVTPEWDFCCKGLALDLEDGNFLKLAN 80
gi|395816322 MAQHFLAACDVGFDLHTLRYNLPESAPLIYNSFAQFLVKEKGYDKELLNVTPEWDFCCKGLALDLEDGNFLKLAN 80
gi|826310252 MAQHFLAACDVGFDLHTLRYNLPESAPLIYNSFAQFLVKEKGYDKELLNVTPEWDFCCKGLALDLEDGNFLKLAN 80
gi|410959884 MAQHFLAACDVGFDLHTLRYNLPESAPLIYNSFAQFLVKEKGYDKELLNVTPEWDFCCKGLALDLEDGNFLKLAN 80
gi|585164297 MAQHFLAACDVGFDLHTLRYNLPESAPLIYNSFAQFLVKEKGYDKELLNVTPEWDFCCKGLALDLEDGNFLKLAN 80
gi|586987268 MAQHFLAACDVGFDLHTLRYNLPESAPLIYNSFAQFLVKEKGYDKELLNVTPEWDFCCKGLALDLEDGNFLKLAN 80
gi|472356764 MAQHFLAACDVGFDLHTLRYNLPESAPLIYNSFAQFLVKEKGYDKELLNVTPEWDFCCKGLALDLEDGNFLKLAN 80
gi|602685616 MAQHFLAACDVGFDLHTLRYNLPESAPLIYNSFAQFLVKEKGYDKELLNVTPEWDFCCKGLALDLEDGNFLKLAN 80
gi|667279819 MAQHFLAACDVGFDLHTLRYNLPESAPLIYNSFAQFLVKEKGYDKELLNVTPEWDFCCKGLALDLEDGNFLKLAN 80
gi|667279822 MAQHFLAACDVGFDLHTLRYNLPESAPLIYNSFAQFLVKEKGYDKELLNVTPEWDFCCKGLALDLEDGNFLKLAN 80
gi|465979262 MAQHFLAACDVGFDLHTLRYNLPESAPLIYNSFAQFLVKEKGYDKELLNVTPEWDFCCKGLALDLEDGNFLKLAN 80
gi|194035204 MAQHFLAACDVGFDLHTLRYNLPESAPLIYNSFAQFLVKEKGYDKELLNVTPEWDFCCKGLALDLEDGNFLKLAN 80
gi|759133407 MAQHFLAACDVGFDLHTLRYNLPESAPLIYNSFAQFLVKEKGYDKELLNVTPEWDFCCKGLALDLEDGNFLKLAN 80
gi|641734335 MAQHFLAACDVGFDLHTLRYNLPESAPLIYNSFAQFLVKEKGYDKELLNVTPEWDFCCKGLALDLEDGNFLKLAN 80
gi|511930642 MAQHFLAACDVGFDLHTLRYNLPESAPLIYNSFAQFLVKEKGYDKELLNVTPEWDFCCKGLALDLEDGNFLKLAN 80
gi|744561719 MAQHFLAACDVGFDLHTLRYNLPESAPLIYNSFAQFLVKEKGYDKELLNVTPEWDFCCKGLALDLEDGNFLKLAN 80
gi|558121862 MAQHFLAACDVGFDLHTLRYNLPESAPLIYNSFAQFLVKEKGYDKELLNVTPEWDFCCKGLALDLEDGNFLKLAN 80
gi|478495911 MAQHFLAACDVGFDLHTLRYNLPESAPLIYNSFAQFLVKEKGYDKELLNVTPEWDFCCKGLALDLEDGNFLKLAN 80
gi|556739024 MAQHFLAACDVGFDLHTLRYNLPESAPLIYNSFAQFLVKEKGYDKELLNVTPEWDFCCKGLALDLEDGNFLKLAN 80
gi|655843044 MAQHFLAACDVGFDLHTLRYNLPESAPLIYNSFAQFLVKEKGYDKELLNVTPEWDFCCKGLALDLEDGNFLKLAN 80
gi|507925770 MAQHFLAACDVGFDLHTLRYNLPESAPLIYNSFAQFLVKEKGYDKELLNVTPEWDFCCKGLALDLEDGNFLKLAN 80
gi|829980860 MAQHFLAACDVGFDLHTLRYNLPESAPLIYNSFAQFLVKEKGYDKELLNVTPEWDFCCKGLALDLEDGNFLKLAN 80
gi|426234499 MAQHFLAACDVGFDLHTLRYNLPESAPLIYNSFAQFLVKEKGYDKELLNVTPEWDFCCKGLALDLEDGNFLKLAN 80
gi|157428094 MAQHFLAACDVGFDLHTLRYNLPESAPLIYNSFAQFLVKEKGYDKELLNVTPEWDFCCKGLALDLEDGNFLKLAN 80
gi|594063404 MAQHFLAACDVGFDLHTLRYNLPESAPLIYNSFAQFLVKEKGYDKELLNVTPEWDFCCKGLALDLEDGNFLKLAN 80
gi|803097535 MAQHFLAACDVGFDLHTLRYNLPESAPLIYNSFAQFLVKEKGYDKELLNVTPEWDFCCKGLALDLEDGNFLKLAN 80
gi|670997190 MGQ-----VAQLIYNSFAQFLVKEKGYDKELLNVTPEWDFCCKGLALDLEDGNFLKLAN 55
gi|548479506 MAQHFLAACDVGFDLHTLRYNLPESAPLIYNSFAQFLVKEKGYDKELLNVTPEWDFCCKGLALDLEDGNFLKLAN 80
gi|555991352 MAQHFLAACDVGFDLHTLRYNLPESAPLIYNSFAQFLVKEKGYDKELLNVTPEWDFCCKGLALDLEDGNFLKLAN 80
gi|528960483 MAQHFLAACDVGFDLHTLRYNLPESAPLIYNSFAQFLVKEKGYDKELLNVTPEWDFCCKGLALDLEDGNFLKLAN 80
gi|594063406 MAQHFLAACDVGFDLHTLRYNLPESAPLIYNSFAQFLVKEKGYDKELLNVTPEWDFCCKGLALDLEDGNFLKLAN 80
gi|548479508 MAQHFLAACDVGFDLHTLRYNLPESAPLIYNSFAQFLVKEKGYDKELLNVTPEWDFCCKGLALDLEDGNFLKLAN 80
gi|664701045 M-----LIYNSFAQFLVKEKGYDKELLNVTPEWDFCCKGLALDLEDGNFLKLAN 50
gi|820999445 MAQHFLAACDVGFDLHTLRYNLPESAPLIYNSFAQFLVKEKGYDKELLNVTPEWDFCCKGLALDLEDGNFLKLAN 80
gi|554586740 -----MTGQEVDRSLIRL----TGKLIYNSFAQFLVKEKGYDKELLNVTPEWDFCCKGLALDLEDGNFLKLAN 65
gi|584073388 -----MTGQEVDRSLIRL----TGKLIYNSFAQFLVKEKGYDKELLNVTPEWDFCCKGLALDLEDGNFLKLAN 65
gi|558127235 -----MTGQEVDRSLIRL----TGKLIYNSFAQFLVKEKGYDKELLNVTPEWDFCCKGLALDLEDGNFLKLAN 65
gi|512920735 MAQHFLAACDVGFDLHTLRYNLPESAPLIYNSFAQFLVKEKGYDKELLNVTPEWDFCCKGLALDLEDGNFLKLAN 80
gi|617593341 MAQHFLAACDVGFDLHTLRYNLPESAPLIYNSFAQFLVKEKGYDKELLNVTPEWDFCCKGLALDLEDGNFLKLAN 80
gi|674085287 MAQYFLATCDVGFDDHTLRYNLPESAPLIYNSFAQFLVKEKGYDKELLNVTPEWDFCCKGLALDLEDGNFLKLAN 80
gi|820979643 -----MIEGAFK-----GTINEQCA 16
gi|625280199 MAQHFLAACDVGFDLHTLRYNLPESAPLIYNSFAQFLVKEKGYDKELLNVTPEWDFCCKGLALDLEDGNFLKLAN 80
gi|532041477 MAQHFLAACDVGFDLHTLRYNLPESAPLIYNSFAQFLVKEKGYDKELLNVTPEWDFCCKGLALDLEDGNFLKLAN 80
gi|625280201 MAQHFLAACDVGFDLHTLRYNLPESAPLIYNSFAQFLVKEKGYDKELLNVTPEWDFCCKGLALDLEDGNFLKLAN 80
gi|672086605 MAQHFLAACDVGFDLHTLRYNLPESAPLIYNSFAQFLVKEKGYDKELLNVTPEWDFCCKGLALDLEDGNFLKLAN 80
gi|110626010 MAQHFLGACDVGFDLHTLRYNLPESAPLIYNSFAQFLVKEKGYDEGLLTLTPEDWDFCCKGLALDLEDGNFLKLAN 80
gi|524945211 MAQHFLAACDVGFDLHTLRYNLPESAPLIYNSFAQFLVKEKGYDKELLNVTPEWDFCCKGLALDLEDGNFLKLAN 80
gi|568965457 MAQHFLGACDVGFDLHTLRYNLPESAPLIYNSFAQFLVKEKGYDEGLLTLTPEDWDFCCKGLALDLEDGNFLKLAN 80
gi|672086607 MAQHFLAACDVGFDLHTLRYNLPESAPLIYNSFAQFLVKEKGYDEGLLTLTPEDWDFCCKGLALDLEDGNFLKLAN 80
gi|675654013 MAQHFLAACDVGFDLHTLRYNLPESAPLIYNSFAQFLVKEKGYDKELLNVTPEWDFCCKGLALDLEDGNFLKLAN 80
gi|530639256 MTRPFLAACDVGFDLHTLRYNLPESAPLIYNSFAQFLVKEKGYDKELLNVTPEWDFCCKGLALDLEDGNFLKLAN 80
gi|543344792 MQQHFLAACDVGFDLHTLRYNLPESAPLIYNSFAQFLVTEKGYDELLTLAPDSLDFCCKGLVLDIEEGNFKLAE 80
gi|542164235 MQQHFLAACDVGFDLHTLRYNLPESAPLIYNSFAQFLVTEKGYDELLTLAPDSLDFCCKGLVLDIEEGNFKLAE 80
gi|363732051 MQQHFLAACDVGFDLHTLRYNLPESAPLIYNSFAQFLVTEKGYDELLTLAPDSLDFCCKGLVLDIEEGNFKLAE 80
gi|683891145 MQQHFLAACDVGFDLHTLRYNLPESAPLIYNSFAQFLVTEKGYDELLTLAPDSLDFCCKGLVLDIEEGNFKLAE 80
gi|543344789 MQQHFLAACDVGFDLHTLRYNLPESAPLIYNSFAQFLVTEKGYDELLTLAPDSLDFCCKGLVLDIEEGNFKLAE 80
gi|449497791 MQQHFLAACDVGFDLHTLRYNLPESAPLIYNSFAQFLVTEKGYDELLTLAPDSLDFCCKGLVLDIEEGNFKLAE 80
gi|542164233 MQQHFLAACDVGFDLHTLRYNLPESAPLIYNSFAQFLVTEKGYDELLTLAPDSLDFCCKGLVLDIEEGNFKLAE 80
gi|50744564 MQQHFLAACDVGFDLHTLRYNLPESAPLIYNSFAQFLVTEKGYDELLTLAPDSLDFCCKGLVLDIEEGNFKLAE 80
gi|729750329 MQQHFLAACDVGFDLHTLRYNLPESAPLIYNSFAQFLVTEKGYDELLTLAPDSLDFCCKGLVLDIEEGNFKLAE 80
gi|768365056 MQQHFLAACDVGFDLHTLRYNLPESAPLIYNSFAQFLVTEKGYDELLTLAPDSLDFCCKGLVLDIEEGNFKLAE 80
1.....10.....20.....30.....40.....50.....60.....70.....80

```

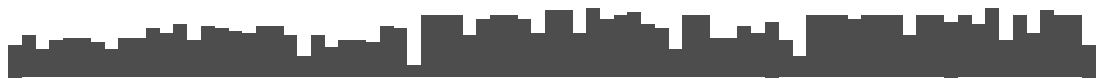

```

lcl|Query_37229  .. : :: . : * * *****: : * *
gi|114608985  NGTVLRASHGTRKMMTPEVLAEEAYGKKEWKHFVSD-----TGMACRS  GKYYFYDNYFDLPGALLCARVVDYL-TKL  149
gi|426354317  NGTVLRASHGTRKMMTPEVLAEEAYGKKEWKHFVSD-----TGMACRS  GKYYFYDNYFDLPGALLCARVVDYL-TKL  149
gi|795513538  NGTVLRASHGTRKMMAPEVLAEEAYGKKEWKHFVSD-----TGMACRS  GKYYFYDNYFDLPGALLCARVVDYL-TKQ  149
gi|387763464  NGTVLRASHGTRKMMAPEVLAEEAYGKKEWKHFVSD-----TGMACRS  GKYYFYDNYFDLPGALLCARVVDYL-TKQ  149
gi|795549508  NGTVLRASHGTRKMMAPEVLAEEAYGKKEWKHFVSD-----TGMACRS  GKYYFYDNYFDLPGALLCARVVDYL-TQQ  149
gi|795513542  NGTVLRASHGTRKMMAPEVLAEEAYGKKEWKHFVSD-----TGMACRS  GKYYFYDNYFDLPGALLCARVVDYL-TK-  148
gi|544424790  NGTVLRASHGTRKMMAPEVLAEEAYGKKEWKHFVSD-----TGMACRS  GKYYFYDNYFDLPGALLCARVVDYL-TK-  148
gi|724807254  NGTVLRASHGTRKMMAPEVLAEEAYGKKEWKHFVSD-----TGMACRS  GKYYFYDNYFDLPGALLCARVVDYL-TKQ  149
gi|795130302  NGTVLRASHGTRKMMAPEVLAEEAYGKKEWKHFVSD-----TGMACRS  GKYYFYDNYFDLPGALLCARVVDYL-TKQ  149
gi|817291021  NGTVLRASHGTRKMMTPAVVAEEAYGKKEWKHFVSD-----TGMACRS  GKYYFYDNYFDLPGALLCARVVDYL-TKQ  149
gi|296199057  NGTVLRASHGTRKMMTPAVLAEEAYGKKEWKHFVSD-----TGMACRS  GKYYFYDNYFDLPGALLCARVVDYL-TKQ  149
gi|724807257  NGTVLRASHGTRKMMAPEVLAEEAYGKKEWKHFVSD-----TGMACRS  GKYYFYDNYFDLPGALLCARVVDYL-TK-  148
gi|403295527  NGTVLRASHGTRKMMTPAVLAEEAYGKKEWKHFVSD-----TGMACRS  GKYYFYDNYFDLPGALLCARVVDYL-TKQ  149
gi|817291023  NGTVLRASHGTRKMMTPAVVAEEAYGKKEWKHFVSD-----TGMACRS  GKYYFYDNYFDLPGALLCARVVDYL-TK-  148
gi|675654011  NGTVLRASHGTRKMMTPAVLAEEAYGKKEWKHFVSD-----TGMACRS  GKYYFYDNYFDLPGALLCARVVDYL-TK-  148
gi|725594041  NGTVLRASHGTRKMMTPAVLAEEAYGKKEWKHFVSD-----TGMACRS  GKYYFYDNYFDLPGALLCARVVDYL-TK-  148
gi|829988711  NGTVLRASHGTRKMMTPEALAEAYGKKEWKHFVSD-----TGMC  CRSGKYYFYDNYFDLPGALLCARVVDLL-TKH  149
gi|395816322  NGTVLRASHGTRKMMTAEALSAAYGKKEWKHFVSD-----TGMVCRS  GKYYFYDNYFDLPGALLCARVVDLL-TKQ  149
gi|826310252  NGTVLRASHGTRKMMTPEALAEAYGKKEWKHFVSD-----TGMT  CRSGKYYFYDNYFDLPGALLCARVVDLL-TKH  149
gi|410959884  NGTVLRASHGTRKMMAPEALAEYGGKEWKYFMSD-----TGMACRS  GKYYFYDNYFDLPGALLCARVVDLSL-TKQ  149
gi|585164297  NGTVLRASHGTRKMMAPEALVEEYGRKEWKHFMSD-----AGMACRS  GKYYFYDNYFDLPGALLCARVVDLSL-TKQ  149
gi|586987268  NGTVLRASHGTRKMMAPEALAEYGGKEWKYFMSD-----TGMACRS  GKYYFYDNYFDLPGALLCARVVDLSL-TK-  148
gi|472356764  NGTVLRASHGTRKMMAPEALVEEYGRKEWKHFMSD-----AGMACRS  GKYYFYDNYFDLPGALLCARVVDLSL-TKQ  149
gi|602685616  NGTVLRASHGTRKMLAPEVLAEEYGRKEWKHFVSD-----SGMACRS  GKYYFYDNYFDLPGALLCARVVDLSL-TKQ  149
gi|667279819  NGTVLRASHGTRKMMTPEALAEVYGGKEWKHFMSD-----TGMPCRS  GKYYFYDNYFDLPGALLCARVVDLSL-TKQ  149
gi|667279822  NGTVLRASHGTRKMMTPEALAEVYGGKEWKHFMSD-----TGMPCRS  GKYYFYDNYFDLPGALLCARVVDLSL-TK-  148
gi|465979262  NGTVLRASHGTRKMLAPEVLAEEYGRKEWKHFVSD-----SGMACRS  GKYYFYDNYFDLPGALLCARVVDLSL-TKQ  149
gi|194035204  NGTVLRASHGTRKMLTPEALAEYGGKEWKHFVSD-----SGTACRS  GKYYFYDNYFDLPGALLCARVVDLSL-TKQ  149
gi|759133407  NGTVLRASHGTRKMMAPEALAEYGRKWKYFMSD-----TGMACRS  GKYYFYDNYFDLPGALLCARVVDLSL-TKA  149
gi|641734335  NGTVLRASHGTRMLAPEELAEYGRREWKYFMSD-----AGMALRS  GKYYFYDNYFDLPGALLCARVVDLSL-TKQ  149
gi|511930642  NGTVLRASHGTRKMMAPEALAEYGGKEWKHFMSD-----AGMACRS  GKYYFYDNYFDLPGALLCARVVDLSL-SKR  149
gi|744561719  NGSVLRASHGTRMMAPEALAEYGRREWRHFPAE-----AAVACRS  GKYYFYDNYFDLPGALLCARVVDLSL-TK-  148
gi|558121862  NGTVLRASHGTRMLAPEELAEYGGKEWKYFMSD-----TGMAFRS  GKYYFYDNYFDLPGALLCARVVDLSL-TKQ  149
gi|478495911  NGTVLRASHGTRKMMAPEALAEYGGKEWKHFVSD-----TGWSCR  GKCYFYDNYFDLPGALLCARVVDLSL-TKQ  149
gi|556739024  NGTVLRASHGTRKMLSPEALAEYFGRKEWKHFMPD-----TGMAFRS  GKYYFYDNYFDLPGALLCARVVDLSL-TKQ  149
gi|655843044  DGTVLRASHGTRKMMTPEALAEAYGKKEWKHFVSD-----TGMPCRS  GKYYFYDNYFDLPGALLCARVVDLSL-TK-  148
gi|507925770  DGTVLRASHGTRKMLVAAQALAEYGSKAWKHFMSD-----TETASRS  GKYYFYDNYFDLPGALLCARVVDL-TKK  149
gi|829980860  DGTVLRASHGTRKMLVAAQALAEYGSKAWKHFMSD-----TETASRS  GKYYFYDNYFDLPGALLCARVVDL-TK-  148
gi|426234499  NGTVLRASHGTRKMLSPEALAEYFGRKEWKHFMPD-----TGMAFRS  GKYYFYDNYFDLPGALLCARVVDLSL-TKQ  149
gi|157428094  NGTVLRASHGTRKMLSAEALAEYFGRKEWKHFMPD-----TGMAFRS  GKYYFYDNYFDLPGALLCARVVDLSL-TKQ  149
gi|594063404  NGTVLRASHGTRKMLSAEALAEYFGRKQWKHFMPD-----TGMAFRS  GKYYFYDNYFDLPGALLCARVVDLSL-TKQ  149
gi|803097535  NGTVLRASHGTRKMLSPEALAEYFGRKEWKHFMPD-----TGMAFRS  GKYYFYDNYFDLPGALLCARVVDLSL-TK-  148
gi|670997190  NGTVLRASHGTRKMMPEALAAAYGRKEWKHFMSD-----TGMACRS  GKYYFYDNYFDLPGALLCARVVDLSL-TKQ  124
gi|548479506  NGTVLRASHGTRKMLSPEALAAEFGRKEWKHFMPD-----TGMAFRS  GKYYFYDNYFDLPGALLCARVVDLSL-TKQ  149
gi|555991352  NGTVLRASHGTRKMLSAEALAEYFGRKEWKHFMPD-----TGMAFRS  GKYYFYDNYFDLPGALLCARVVDLSL-TKQ  149
gi|528960483  NGTVLRASHGTRKMLSAEALAEYFGRKEWKHFMPD-----TGMAFRS  GKYYFYDNYFDLPGALLCARVVDLSL-TK-  148
gi|594063406  NGTVLRASHGTRKMLSAEALAEYFGRKQWKHFMPD-----TGMAFRS  GKYYFYDNYFDLPGALLCARVVDLSL-TK-  148
gi|548479508  NGTVLRASHGTRKMLSPEALAAEFGRKEWKHFMPD-----TGMAFRS  GKYYFYDNYFDLPGALLCARVVDLSL-TK-  148
gi|664701045  NGTVLRASHGTRKMMAPEVLAEEYGRKEWKHFVSD-----TGMAFRS  GKYYFYDNYFDLPGALLCARVVDLSL-TKQ  119
gi|820999445  NGTVLRASRGTRKMMAPDVLAEYGAKEWKYFVSD-----TGMPSHP  GKYYFYDNYFDLPGALLCARVVDLSL-TKQ  149
gi|554586740  NGTVLRASHGTRMLAPEELAEYGGREWKYFMSD-----TGMAFRS  GKYYFYDNYFDLPGALLCARVVDLSL-TKQ  134
gi|584073388  NGTVLRASHGTRMLAPEELAEYGGREWKYFMSD-----SGMAFRS  GKYYFYDNYFDLPGALLCARVVDLSL-TKQ  134
gi|558127235  NGTVLRASHGTRMLAPEELAEYGGREWKYFMSD-----TGMAFRS  GKYYFYDNYFDLPGALLCARVVDLSL-TKQ  134
gi|512920735  NGTVLRASHGTRKMMTPDMLAEAYGKKEWKYFVSD-----TGMPSHP  GKYYFYDNYFDLPGALLCARVADSL-TKQ  149
gi|617593341  NGTVLSRSRWRRCQAQMTL-----GKYYFYDNYFDLPGALLCARVVDLSL-TKK  127
gi|674085287  DGTVLRASHGTRKMMTPEALAKAYGKKEWKHFVSD-----TDMPCCS  GKCYFYDNYFDLPGALLCARVVDLSL-TK-  148
gi|820979643  SSLKIRASHGTRKMMTPEVLAEEAYGKKEWKHFVSD-----TGMACRS  GKYYFYDNYFDLPGALLCARVVDYL-TKQ  85
gi|625280199  DGTVLRASHGTRKMMTPEELVETYGKDWHRHCTDRHCAANV---DIPCCS  GKCYFYDNYFDLPGALLCARVVDLSL-TK-  154
gi|532041477  DGTVLRASHGTRKMMTPEALAEYTGKDWHRHCTDRHCAANV---DIPCCS  GKCYFYDNYFDLPGALLCARVVDLSL-TK-  154
gi|625280201  DGTVLRASHGTRKMMTPEELVETYGKDWHRHCTDRHCAANV---DIPCCS  GKCYFYDNYFDLPGALLCARVVDLSL-TK-  154
gi|672086605  DGTVLRASHGTRKMMTPEALTEAYGKKEWRHCLSDKRSVSG---SDIPCCS  GKCYFYDNYFDLPGALLCAKVVDSL-TK-  154
gi|110626010  DGTVLRASHGTRKMMTPEALTEAYGKKEWRHCVSDKRCVSDKPGVSDIPCCS  GKCYFYDNYFDLPGALLCARVVDLSL-TK-  158
gi|524945211  DGTVLRASHGTRKMMTPEELVETYGKDWHRHCTDRHCTSNI---DVPCCS  GKCYFYDNYFDLPGALLCARVVDLSL-TK-  154
gi|568965457  DGTVLRASHGTRKMMTPEALTEAYGKKEWRHCVSDKRCVSDKPGVSDIPCCS  GKCYFYDNYFDLPGALLCARVVDLSL-TK-  158
gi|672086607  DGTVLRASHGTRKMMTPEALTEAYGKKEWRHCLSDKRSVSG---SDIPCCS  GKCYFYDNYFDLPGALLCAKVVDSL-TK-  154
gi|675654013  NGTVLRASHGTRKMMTPAVLAEEAYGKKEWKHFVSD-----TGMACRS  GKYYFYDNYFDLPGALLCARVVDYL-TKQ  149
gi|530639256  DGTILRASHGTRKSMTPPEELLEIYGRREWKHFNTV-----SGMVSRS  AKYYLYDNYFDLPGALLCARVVDCL-DK-  148
gi|543344792  DGTVLRASHGTRKSMTPSEELLEIYGRREWKHFNTV-----SGMVSRT  AKYYLYDNYFDLPGALLCARVVDLSL-DOL  149
gi|542164235  DGTVLRASHGTRKSMTPSEEVLEIYGRKEWKHFNTV-----SGMVSRT  AKYYLYDNYFDLPGALLCARVVDLSL-DOL  149
gi|363732051  DGTVLRASHGTRKSMTPSEELLEIYGRREWKHFNTV-----SGMVSRS  AKYYLYDNYFDLPGALLCARVVDKLLKM-  149
gi|683891145  DGTVLRASHGTRKSMTPSEEVLEIYGRKEWKHFNTV-----SGMVSRT  AKYYLYDNYFDLPGALLCARVVDLSL-DOL  149
gi|543344789  DGTVLRASHGTRKSMTPSEELLEIYGRKEWKHFNTV-----SGMVSRT  AKYYLYDNYFDLPGALLCARVVDLSL-DOL  148
gi|449497791  DGTVLRASHGTRKSMTPSEEVLEIYGRKEWKHFNTV-----SGMVSRT  AKYYLYDNYFDLPGALLCARVVDLSL-DOL  148
gi|542164233  DGTVLRASHGTRKSMTPSEEVLEIYGRKEWKHFNTV-----SGMVSRT  AKYYLYDNYFDLPGALLCARVVDLSL-DOL  148
gi|50744564  DGTVLRASHGTRKSMTPSEELLEIYGRREWKHFNTV-----SGMVSRS  AKYYLYDNYFDLPGALLCARVVDLSL-DOL  148
gi|729750329  DGTVLRASHGTRKSMTPSEEVLEIYGRREWKHFNTV-----SGMVSRS  AKYYLYDNYFDLPGALLCARVVDLSL-DOL  148
gi|768365056  DGTVLRASHGTRKSMTPSEELLEIYGRREWKHFNTV-----SGMVSRS  AKYYLYDNYFDLPGALLCARVVDLSL-DOL  148
.....90.....100.....110.....120.....130.....140.....150.....160

```

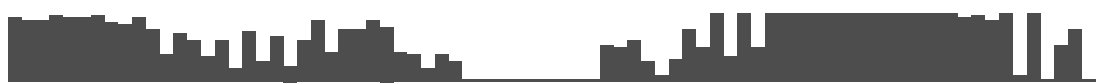





```

* : ** ** **:*****: *.*.* *:.*:.*: * :***** :* :*****.:*:*
lcl|Query_37229 LCEYILGNDFDTLFDIVITNALKPGFFSHLPSQRPFRITLNDDEEAEALPSLDKPGWYSQGNVHLYELLKKMTGKPEPKV 308
gi|114608985 LCEYILGNDFDTLFDIVITNALKPGFFSHLPSQRPFRITLNDDEEAEALPSLDKPGWYSQGNVHLYELLKKMTGKPEPKV 308
gi|426354317 LCEYILGNDFDTLFDIVITNALKPGFFSHLPSQRPFRITLNDDEEAEALPSLDKPGWYSQGNVHLYELLKKMTGKPEPKV 308
gi|795513538 LCEYILGNDFDTLFDVVIITNALKPGFFSHLPSQRPFRITLNDDEEAEALPSLDKPGWYSQGNVHLYELLKKMTGKPEPKV 308
gi|387763464 LCEYILGNDFDTLFDVVIITNALKPGFFSHLPSQRPFRITLNDDEEAEALPSLDKPGWYSQGNVHLYELLKKMTGKPEPKV 308
gi|795549508 LCEYILGNDFDTLFDVVIITNALKPGFFSHLPSQRPFRITLNDDEEAEALPSLDKPGWYSQGNVHLYELLKKMTGKPEPKV 308
gi|795513542 LCEYILGNDFDTLFDVVIITNALKPGFFSHLPSQRPFRITLNDDEEAEALPSLDKPGWYSQGNVHLYELLKKMTGKPEPKV 307
gi|544424790 LCEYILGNDFDTLFDVVIITNALKPGFFSHLPSQRPFRITLNDDEEAEALPSLDKPGWYSQGNVHLYELLKKMTGKPEPKV 307
gi|724807254 LCEYILGNDFDTLFDIVITNALKPGFFSHLPSQRPFRITLNDDEEAEALPSLDKPGWYSQGNVHLYELLKKMTGKPEPKV 308
gi|795130302 LCEYILGNDFDTLFDIVITNALKPGFFSHLPSQRPFRITLNDDEEAEALPSLDKPGWYSQGNVHLYELLKKMTGKPEPKV 308
gi|817291021 LCDYILGNDFADLFDIVITNALKPGFFSHLPSQRPFRITLNDDEEAEALPSLDKPGWYSQGNVHLYELLKKMTGKPEPKV 308
gi|296199057 LCEYILGNDFADLFDIVITNALKPGFFSHLPSQRPFRITLNDDEEAEALPSLDKPGWYSQGNVHLYELLKKMTGKPEPKV 308
gi|724807257 LCEYILGNDFDTLFDIVITNALKPGFFSHLPSQRPFRITLNDDEEAEALPSLDKPGWYSQGNVHLYELLKKMTGKPEPKV 307
gi|403295527 LCEYILGNDFADLFDIVITNALKPGFFSHLPSQRPFRITLNDDEEAEALPSLDKPGWYSQGNVHLYELLKKMTGKPEPKV 308
gi|817291023 LCDYILGNDFADLFDIVITNALKPGFFSHLPSQRPFRITLNDDEEAEALPSLDKPGWYSQGNVHLYELLKKMTGKPEPKV 307
gi|675654011 LCEYILGNDFADLFDIVITNALKPGFFSHLPSQRPFRITLNDDEEAEALPSLDKPGWYSQGNVHLYELLKKMTGKPEPKV 307
gi|725594041 LCEYILGNDFADLFDIVITNALKPGFFSHLPSQRPFRITLNDDEEAEALPSLDKPGWYSQGNVHLYELLKKMTGKPEPKV 307
gi|829988711 LCEYILGNDFADLFDIVITNALKPGFFSHLPSQRPFRITLNDDEEAEALPSLEKPGWYSQGNVGHLYELLKKMTGKPEPKV 308
gi|395816322 LCEYILGNDFADLFDVVIITNALKPGFFSHLPSQRPFRITLNDDEEAEALPSLDKPGWYSQGNVHLYELLKKMTGKPEPKV 308
gi|826310252 LCEYILGNDFADLFDIVITNALKPGFFSHLPSQRPFRITLNDDEEAEALPSLEKPGWYSQGNVGHLYELLKKMTGKPEPKV 308
gi|410959884 LCEYILGNDFDTLFDIVITNALKPGFFSHLPSQRPFRITLNDDEEAEALPSLDKPGWYSQGNVHLYELLKKMTGKSEPKV 308
gi|585164297 LCEYILGNDFDTLFDIVITNALKPGFFSHLPSQRPFRITLNDDEEAEALPSLDKPGWYSQGNVHLYELLKKMTGKPEPKV 308
gi|586987268 LCEYILGNDFDTLFDIVITNALKPGFFSHLPSQRPFRITLNDDEEAEALPSLDKPGWYSQGNVHLYELLKKMTGKSEPKV 307
gi|472356764 LCEYILGNDFDTLFDIVITNALKPGFFSHLPSQRPFRITLNDDEEAEALPSLDKPGWYSQGNVHLYELLKKMTGKNEPKV 308
gi|602685616 LCEYILGNDFEYLFDIVITNALKPGFFSHLPSQRPFRITLNDDEEAEALPSLDKPGWYSQGNVHLYELLKKMTGKPEPKV 308
gi|667279819 LCKYILGNDFADLFDIVITNALKPGFFSHLPSQRPFRITLNDDEEAEALPSLDKPGWYSQGNVHLYELLKKMTGKPEPKV 307
gi|667279822 LCKYILGNDFADLFDIVITNALKPGFFSHLPSQRPFRITLNDDEEAEALPSLDKPGWYSQGNVHLYELLKKMTGKPEPKV 306
gi|465979262 LCEYILGNDFEYLFDIVITNALKPGFFSHLPSQRPFRITLNDDEEAEALPSLDKPGWYSQGNVHLYELLKKMTGKPEPKV 308
gi|194035204 LCRYILGNDFEYLFDIVITNALKPGFFSHLPSQRPFRITLNDDEEAEALPSLDKPGWYSQGNVHLYELLKKMTGPEPKV 308
gi|759133407 LCKHILGNDFADLFDIVITNALKPGFFSHLPSQRPFRITLNDDEEAEALPSLDKPGWYSQGNVHLYELLKKMTGKPEPKV 308
gi|641734335 LCNHILGNDFADLFDIVITNALKPGFFSHLPSQRPFRITLNDDEEAEALPSLDKPGWYSQGNVHLYELLKKMTGKPEPKV 308
gi|511930642 LCEYILGNDFADLFDIVITNALKPGFFSHLPSQRPFRITLNDDEEAEALPSLDKPGWYSQGNVHLYELLKKMTGKNEPKV 308
gi|744561719 LCEYILGNDFEDLFDIVITNALKPGFFSHLPSQRPFRITLNDDEEAEALPSLDKPGWYSQGNVHLYELLKKMTGKPEPKV 307
gi|558121862 LCNHILGNDFADLFDIVITNALKPGFFSHLPSQRPFRITLNDDEEAEALPSLEKPGWYSQGNVHLYELLKKMTGKPEPKV 308
gi|478495911 LCEHILGNDFADLFDIVITNALKPGFFSQSPQRPFRITLNDDEEAEALPSLDKPGWYSQGNVHLYELLKKMTGKPEPKV 308
gi|556739024 LCEYILGNDFEYLFDIVITNALKPGFFSHLPSQRPFRITLNDDEEAEALPSLDKPGWYSQGNVHLYELLKKMTGKPEPKV 308
gi|655843044 LCEYILGNDFADLFDIVITNALKPGFFSHLPSQRPFRITLNDDEEAEALPSLDKPGWYSQGNVHLYELLKKMTGKPEPKV 308
gi|507925770 LCEYILGNDFDPLFDIIIITNALKPGFFSHLPSQRPFRITLNDDEEAEALPSLDKPGWYSQGNVHLYELLKKMTGKPEPKV 308
gi|829980860 LCEYILGNDFDPLFDIIIITNALKPGFFSHLPSQRPFRITLNDDEEAEALPSLDKPGWYSQGNVHLYELLKKMTGKPEPKV 307
gi|426234499 LCEYILGNDFEYLFDIVITNALKPGFFSHLPSQRPFRITLNDDEEAEALPSLDKPGWYSQGNVHLYELLKKMTGKPEPKV 308
gi|157428094 LCQYILGNDFEYLFDIVITNALKPGFFSHLPSQRPFRITLNDDEEAEALPSLDKPGWYSQGNVHLYELLKKMTGKPEPKV 308
gi|594063404 LCQYILGNDFEYLFDIVITNALKPGFFSHLPSQRPFRITLNDDEEAEALPSLDKPGWYSQGNVHLYELLKKMTGKPEPKV 308
gi|803097535 LCEYILGNDFEYLFDIVITNALKPGFFSHLPSQRPFRITLNDDEEAEALPSLDKPGWYSQGNVHLYELLKKMTGKPEPKV 307
gi|670997190 LCEYILGNDFDTLFDIVITNALKPGFFSHLPSQRPFRITLNDDEEAEALPSLDKPGWYSQGNVHLYELLKKMTGRNEPKV 283
gi|548479506 LCEYILGNDFEYLFDIVITNALKPGFFSHLPSQRPFRITLNDDEEAEALPSLDKPGWYSQGNVHLYELLKKMTGKPEPKV 308
gi|555991352 LCQYILGNDFEYLFDIVITNALKPGFFSHLPSQRPFRITLNDDEEAEALPSLDKPGWYSQGNVHLYELLKKMTGKPEPKV 308
gi|528960483 LCQYILGNDFEYLFDIVITNALKPGFFSHLPSQRPFRITLNDDEEAEALPSLDKPGWYSQGNVHLYELLKKMTGKPEPKV 307
gi|594063406 LCQYILGNDFEYLFDIVITNALKPGFFSHLPSQRPFRITLNDDEEAEALPSLDKPGWYSQGNVHLYELLKKMTGKPEPKV 307
gi|548479508 LCEYILGNDFEYLFDIVITNALKPGFFSHLPSQRPFRITLNDDEEAEALPSLDKPGWYSQGNVHLYELLKKMTGKPEPKV 307
gi|664701045 LCEHILGNDFADLFDIVITNALKPGFFSHLPSQRPFRITLNDDEEAEALPSLDKPGWYSQGNVHLYELLKKMTGKPEPKV 278
gi|820999445 LCEYILGNDFADLFDIVITNALKPGFFSHLPSQRPFRITLNDDEEAEALPSLDKPGWYSQGNVHLYELLKKMTGKPEPKV 308
gi|554586740 LCNHILGNDFADLFDIVITNALKPGFFSHLPSQRPFRITLNDDEEAEALPSLEKPGWYSQGNVHLYELLKKMTGKPEPKV 293
gi|584073388 LCNHILGNDFADLFDIVITNALKPGFFSHLPSQRPFRITLNDDEEAEALPSLEKPGWYSQGNVHLYELLKKMTGKPEPKV 293
gi|558127235 LCNHILGNDFADLFDIVITNALKPGFFSHLPSQRPFRITLNDDEEAEALPSLEKPGWYSQGNVHLYELLKKMTGKPEPKV 293
gi|512920735 LCEYILGNDFADLFDIVITNALKPGFFSHLPSQRPFRITLNDDEEAEALPSLDKPGWYSQGNVHLYELLKKMTGKPEPKV 308
gi|617593341 LCGYILGNDFDIFDIVITNALKPGFFSHLPSQRPFRITLNDDEEAEALPSLDKPGWYSQGNVHLYELLKKMTGKPEPKV 285
gi|674085287 LCNHILGNDFADLFDIVITNALKPGFFSHLPSQRPFRITLNDDEEAEALPSLDKPGWYSQGNVHLYELLKKMTGKPEPKV 308
gi|820979643 LCEYILGNDFDTLFDIVITNALKPGFFSHLPSQRPFRITLNDDEEAEALPSLDKPGWYSQGNVHLYELLKKMTGKPEPKV 244
gi|625280199 LGTYILGKDFADLFDIVITNALKPGFFSHLPSQRPFRITLNDDEEAEALPSLDKPGWYSQGNVHLYELLKKMTGKPEPKV 314
gi|532041177 LGTYILGKDFADLFDIVITNALKPGFFSHLPSQRPFRITLNDDEEAEALPSLDKPGWYSQGNVHLYELLKKMTGKPEPKV 314
gi|625280201 LGTYILGKDFADLFDIVITNALKPGFFSHLPSQRPFRITLNDDEEAEALPSLDKPGWYSQGNVHLYELLKKMTGKPEPKV 313
gi|672086605 LGSYILGKDFADLFDIVITNALKPGFFSHLPSQRPFRITLNDDEEAEALPSLDKPGWYSQGNVHLYELLKKMTGKPEPKV 314
gi|110626010 LGSYILGKDFADLFDIVITNALKPGFFSHLPSQRPFRITLNDDEEAEALPSLDKPGWYSQGNVHLYELLKKMTGKPEPKV 318
gi|524945211 LGTYILGKDFADLFDIVITNALKPGFFSHLPSQRPFRITLNDDEEAEALPSLDKPGWYSQGNVHLYELLKKMTGKPEPKV 314
gi|568965457 LGSYILGKDFADLFDIVITNALKPGFFSHLPSQRPFRITLNDDEEAEALPSLDKPGWYSQGNVHLYELLKKMTGKPEPKV 317
gi|672086607 LGSYILGKDFADLFDIVITNALKPGFFSHLPSQRPFRITLNDDEEAEALPSLDKPGWYSQGNVHLYELLKKMTGKPEPKV 313
gi|675654013 LCEYILGNDFADLFDIVITNALKPGFFSHLPSQRPFRITLNDDEEAEALPSLDKPGWYSQGNVHLYELLKKMTGKPEPKV 308
gi|530639256 LCEHILGNDFADLFDIVITNALKPGFFSQMPNQRPFRTLNDDEEAEALPSLDKPGWYSQGNVHLYELLKKMTGKPEPKV 307
gi|543344792 LCEHVLGSDFEYFDILIITNALKPGFFSHTPNRPFRTLNDDEEAEALPSLDKPGWYSQGNVHLYELLKKMTGKLDPKV 308
gi|542164235 LCEHVLGSDFEYFDILIITNALKPGFFSHTPNRPFRTLNDDEEAEALPSLDKPGWYSQGNVHLYELLKKMTGKLDPKV 308
gi|363732051 LCEYILGNDFEYFDIVITNALKPGFFSHTPNRPFRTLNDDEEAEALPSLDKPGWYSQGNVHLYELLKKMTGKLDPKV 308
gi|683891145 LCEHVLGSDFEYFDILIITNALKPGFFSHTPNRPFRTLNDDEEAEALPSLDKPGWYSQGNVHLYELLKKMTGKLDPKV 308
gi|543344789 LCEHVLGSDFEYFDILIITNALKPGFFSHTPNRPFRTLNDDEEAEALPSLDKPGWYSQGNVHLYELLKKMTGKLDPKV 307
gi|449497791 LCEHVLGSDFEYFDILIITNALKPGFFSHTPNRPFRTLNDDEEAEALPSLDKPGWYSQGNVHLYELLKKMTGKLDPKV 307
gi|542164233 LCEHVLGSDFEYFDILIITNALKPGFFSHTPNRPFRTLNDDEEAEALPSLDKPGWYSQGNVHLYELLKKMTGKLDPKV 307
gi|50744564 LCEYILGNDFEYFDVVIITNALKPGFFSHTPNRPFRTLNDDEEAEALPSLDKPGWYSQGNVHLYELLKKMTGKLDPKV 307
gi|729750329 LCEHILGNDFEYFDIVITNALKPGFFSHTPNRPFRTLNDDEEAEALPSLDKPGWYSQGNVHLYELLKKMTGKLDPKV 307
gi|768365056 LCEHILGNDFEYFDIVITNALKPGFFSHTPNRPFRTLNDDEEAEALPSLDKPGWYSQGNVHLYELLKKMTGKLDPKV 307

```

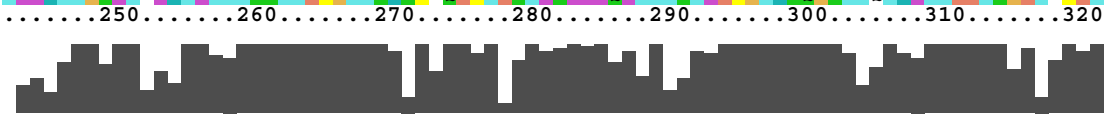



```

*****: ** * :****:*****          : ** **:*:*
lcl|Query_37229 VYFGDSMHSDFIPARHYSNWETVLILEELRGDEGTRSORP-EESEPLEKKGKYE GPKAKPLNTS SKKWGSFFIDSVLGL 387
gi|114608985 VYFGDSMHSDFIPARHYSNWETVLILEELRGDEGTRSORP-EESEPLEKKGKYE GPKAKPLNTS SKKWGSFFIDSVLGL 387
gi|426354317 VYFGDSMHSDFIPARHYSNWETVLILEELRGDEGARSQRP-EESEPLEKKGKYE GPKAKPLNTS SKKWGSFFIDSVLGL 387
gi|795513538 VYFGDSMHSDFIPARHYSNWETVLILEELRGDEGARSQRP-EESEPLEKKGKYE GPKAKPLNTS SKKWGSFFIDSVLGL 387
gi|387763464 VYFGDSMHSDFIPARHYSNWETVLILEELRGDEGARSQRP-EESEPLEKKGKYE GPKAKPLNTS SKKWGSFFIDSVLGL 387
gi|795549508 VYFGDSMHSDFIPARHYSNWETVLILEELRGDEGARSQRP-EESEPLEKKGKYE GPKAKPLNTS SKKWGSFFIDSVLGL 387
gi|795513542 VYFGDSMHSDFIPARHYSNWETVLILEELRGDEGARSQRP-EESEPLEKKGKYE GPKAKPLNTS SKKWGSFFIDSVLGL 386
gi|544424790 VYFGDSMHSDFIPARHYSNWETVLILEELRGDEGARSQRP-EESEPLEKKGKYE GPKAKPLNTS SKKWGSFFIDSVLGL 386
gi|724807254 VYFGDSMHSDFIPARHYSNWETVLILEELRGDEGARSQRP-EESEPLEKKGKYE GPKAKPLNTS SKKWGSFFIDSVLGL 387
gi|795130302 VYFGDSMHSDFIPARHYSNWETVLILEELRGDEGARSQRP-EESEPLEKKGKYE GPKAKPLNTS SKKWGSFFIDSVLGL 387
gi|817291021 VYFGDSMHSDFIPARHYSNWETVLILEELRGDEGTRRQRS-EESEPLEKKGKYE GPKAKPLNTS SKKWGSFFIDSVLGL 387
gi|296199057 VYFGDSMHSDFIPARHYSNWETVLILEELRGDEGTRRQRS-EESEPLEKKGKYE GPKAKPLNTS SKKWGSFFIDSVLGL 387
gi|724807257 VYFGDSMHSDFIPARHYSNWETVLILEELRGDEGARSQRP-EESEPLEKKGKYE GPKAKPLNTS SKKWGSFFIDSVLGL 386
gi|403295527 VYFGDSMHSDFIPARHYSNWETVLILEELRGDEGTRRQRS-EESEPLEKKGKYE GPKAKPLNTS SKKWGSFFIDSVLGL 387
gi|817291023 VYFGDSMHSDFIPARHYSNWETVLILEELRGDEGTRRQRS-EESEPLEKKGKYE GPKAKPLNTS SKKWGSFFIDSVLGL 386
gi|675654011 VYFGDSMHSDFIPARHYSNWETVLILEELRGDEGTRRQRS-EESEPLEKKGKYE GPKAKPLNTS SKKWGSFFIDSVLGL 386
gi|725594041 VYFGDSMHSDFIPARHYSNWETVLILEELRGDEGTRRQRS-EESEPLEKKGKYE GPKAKPLNTS SKKWGSFFIDSVLGL 386
gi|829988711 VYFGDSMHSDFIPAHYSNWETVLILEELRGDEVVRSQRP-EESEPLEKKGKYE GPKAKPLNTS SKKWGSFFIDSVLGL 387
gi|395816322 VYFGDSMHSDFIPARHYSNWETVLILEELRGDEVVRSQRP-EESEPLEKKGKYE GPKAKPLNTS SKKWGSFFIDSVLGL 387
gi|826310252 VYFGDSMHSDFIPAHYSNWETVLILEELRGDEVVRSQRP-EESEPLEKKGKYE GPKAKPLNTS SKKWGSFFIDSVLGL 387
gi|410959884 VYFGDSMHSDFIPARHYSNWETVLILEELRGDEVVRSQRP-EESEPLEKKGKYE GPKAKPLNTS SKKWGSFFIDSVLGL 384
gi|585164297 VYFGDSMHSDFIPARHYSNWETVLILEELRGDEVVRSQRP-EESEPLEKKGKYE GPKAKPLNTS SKKWGSFFIDSVLGL 384
gi|586987268 VYFGDSMHSDFIPARHYSNWETVLILEELRGDEVVRSQRP-EESEPLEKKGKYE GPKAKPLNTS SKKWGSFFIDSVLGL 383
gi|472356764 VYFGDSMHSDFIPARHYSNWETVLILEELRGDEVVRSQRP-EESEPLEKKGKYE GPKAKPLNTS SKKWGSFFIDSVLGL 384
gi|602685616 VYFGDSMHSDFIPACHYSNWETVLILEELRGDEVVRSQRP-EESEPLEKKGKYE GPKAKPLNTS SKKWGSFFIDSVLGL 384
gi|667279819 VYFGDSMHSDFIPACHYSNWETVLILEELRGDEVVRSQRP-EESEPLEKKGKYE GPKAKPLNTS SKKWGSFFIDSVLGL 383
gi|667279822 VYFGDSMHSDFIPACHYSNWETVLILEELRGDEVVRSQRP-EESEPLEKKGKYE GPKAKPLNTS SKKWGSFFIDSVLGL 382
gi|465979262 VYFGDSMHSDFIPACHYSNWETVLILEELRGDEVVRSQRP-EESEPLEKKGKYE GPKAKPLNTS SKKWGSFFIDSVLGL 384
gi|194035204 VYFGDSMHSDFIPASHYSNWETVLILEELRGDEVVRSQRP-EESEPLEKKGKYE GPKAKPLNTS SKKWGSFFIDSVLGL 384
gi|759133407 VYFGDSMHSDFIPARHYSNWETVLILEELRGDEVVRSQRP-EESEPLEKKGKYE GPKAKPLNTS SKKWGSFFIDSVLGL 384
gi|641734335 VYFGDSMHSDFIPARHYSNWETVLILEELRGDEVVRSQRP-EESEPLEKKGKYE GPKAKPLNTS SKKWGSFFIDSVLGL 384
gi|511930642 VYFGDSMHSDFIPARHYSNWETVLILEELRGDEVVRSQRP-EESEPLEKKGKYE GPKAKPLNTS SKKWGSFFIDSVLGL 384
gi|744561719 VYFGDSMHSDFIPARHYSNWETVLILEELRGDEVVRSQRP-EESEPLEKKGKYE GPKAKPLNTS SKKWGSFFIDSVLGL 383
gi|558121862 VYFGDSMHSDFIPARHYSNWETVLILEELRGDEVVRSQRP-EESEPLEKKGKYE GPKAKPLNTS SKKWGSFFIDSVLGL 384
gi|478495911 VYFGDSMHSDFIPARHYSNWETVLILEELRGDEVVRSQRP-EESEPLEKKGKYE GPKAKPLNTS SKKWGSFFIDSVLGL 384
gi|556739024 VYFGDSMHSDFIPACHYSNWETVLILEELRGDEVVRSQRP-EESEPLEKKGKYE GPKAKPLNTS SKKWGSFFIDSVLGL 384
gi|655843044 VYFGDSMHSDFIPARHYSNWETVLILEELRGDEVVRSQRP-EESEPLEKKGKYE GPKAKPLNTS SKKWGSFFIDSVLGL 384
gi|507925770 VYFGDSMHSDFIPARHYSNWETVLILEELRGDEVVRSQRP-EESEPLEKKGKYE GPKAKPLNTS SKKWGSFFIDSVLGL 384
gi|829980860 VYFGDSMHSDFIPARHYSNWETVLILEELRGDEVVRSQRP-EESEPLEKKGKYE GPKAKPLNTS SKKWGSFFIDSVLGL 383
gi|426234499 VYFGDSMHSDFIPACHYSNWETVLILEELRGDEVVRSQRP-EESEPLEKKGKYE GPKAKPLNTS SKKWGSFFIDSVLGL 384
gi|157428094 VYFGDSMHSDFIPACHYSNWETVLILEELRGDEVVRSQRP-EESEPLEKKGKYE GPKAKPLNTS SKKWGSFFIDSVLGL 384
gi|594063404 VYFGDSMHSDFIPACHYSNWETVLILEELRGDEVVRSQRP-EESEPLEKKGKYE GPKAKPLNTS SKKWGSFFIDSVLGL 384
gi|803097535 VYFGDSMHSDFIPACHYSNWETVLILEELRGDEVVRSQRP-EESEPLEKKGKYE GPKAKPLNTS SKKWGSFFIDSVLGL 383
gi|670997190 VYFGDSMHSDFIPARHYSNWETVLILEELRGDEVVRSQRP-EESEPLEKKGKYE GPKAKPLNTS SKKWGSFFIDSVLGL 359
gi|548479506 VYFGDSMHSDFIPACHYSNWETVLILEELRGDEVVRSQRP-EESEPLEKKGKYE GPKAKPLNTS SKKWGSFFIDSVLGL 384
gi|555991352 VYFGDSMHSDFIPACHYSNWETVLILEELRGDEVVRSQRP-EESEPLEKKGKYE GPKAKPLNTS SKKWGSFFIDSVLGL 384
gi|528960483 VYFGDSMHSDFIPACHYSNWETVLILEELRGDEVVRSQRP-EESEPLEKKGKYE GPKAKPLNTS SKKWGSFFIDSVLGL 383
gi|594063406 VYFGDSMHSDFIPACHYSNWETVLILEELRGDEVVRSQRP-EESEPLEKKGKYE GPKAKPLNTS SKKWGSFFIDSVLGL 383
gi|548479508 VYFGDSMHSDFIPACHYSNWETVLILEELRGDEVVRSQRP-EESEPLEKKGKYE GPKAKPLNTS SKKWGSFFIDSVLGL 383
gi|664701045 VYFGDSMHSDFIPARHYSNWETVLILEELRGDEVVRSQRP-EESEPLEKKGKYE GPKAKPLNTS SKKWGSFFIDSVLGL 354
gi|820999445 VYFGDSMHSDFIPASHYSNWETVLILEELRGDEVVRSQRP-EESEPLEKKGKYE GPKAKPLNTS SKKWGSFFIDSVLGL 383
gi|554586740 VYFGDSMHSDFIPARHYSNWETVLILEELRGDEVVRSQRP-EESEPLEKKGKYE GPKAKPLNTS SKKWGSFFIDSVLGL 369
gi|584073388 VYFGDSMHSDFIPARHYSNWETVLILEELRGDEVVRSQRP-EESEPLEKKGKYE GPKAKPLNTS SKKWGSFFIDSVLGL 369
gi|558127235 VYFGDSMHSDFIPARHYSNWETVLILEELRGDEVVRSQRP-EESEPLEKKGKYE GPKAKPLNTS SKKWGSFFIDSVLGL 369
gi|512920735 VYFGDSMHSDFIPASHYSNWETVLILEELRGDEVVRSQRP-EESEPLEKKGKYE GPKAKPLNTS SKKWGSFFIDSVLGL 384
gi|617593341 VYFGDSMHSDFIPARHYSNWETVLILEELRGDEVVRSQRP-EESEPLEKKGKYE GPKAKPLNTS SKKWGSFFIDSVLGL 361
gi|674085287 VYFGDSMHSDFIPARHYSNWETVLILEELRGDEVVRSQRP-EESEPLEKKGKYE GPKAKPLNTS SKKWGSFFIDSVLGL 384
gi|820979643 VYFGDSMHSDFIPARHYSNWETVLILEELRGDEVVRSQRP-EESEPLEKKGKYE GPKAKPLNTS SKKWGSFFIDSVLGL 323
gi|625280199 VYFGDSMHSDFIPAHYSNWETVLILEELRGDEVVRSQRP-EESEPLEKKGKYE GPKAKPLNTS SKKWGSFFIDSVLGL 389
gi|532041477 VYFGDSMHSDFIPAHYSNWETVLILEELRGDEVVRSQRP-EESEPLEKKGKYE GPKAKPLNTS SKKWGSFFIDSVLGL 390
gi|625280201 VYFGDSMHSDFIPAHYSNWETVLILEELRGDEVVRSQRP-EESEPLEKKGKYE GPKAKPLNTS SKKWGSFFIDSVLGL 388
gi|672086605 VYFGDSMHSDFIPAHYSNWETVLILEELRGDEVVRSQRP-EESEPLEKKGKYE GPKAKPLNTS SKKWGSFFIDSVLGL 390
gi|110626010 VYFGDSMHSDFIPAHYSNWETVLILEELRGDEVVRSQRP-EESEPLEKKGKYE GPKAKPLNTS SKKWGSFFIDSVLGL 394
gi|524945211 VYFGDSMHSDFIPAHYSNWETVLILEELRGDEVVRSQRP-EESEPLEKKGKYE GPKAKPLNTS SKKWGSFFIDSVLGL 390
gi|568965457 VYFGDSMHSDFIPAHYSNWETVLILEELRGDEVVRSQRP-EESEPLEKKGKYE GPKAKPLNTS SKKWGSFFIDSVLGL 393
gi|672086607 VYFGDSMHSDFIPAHYSNWETVLILEELRGDEVVRSQRP-EESEPLEKKGKYE GPKAKPLNTS SKKWGSFFIDSVLGL 389
gi|675654013 VYFGDSMHSDFIPARHYSNWETVLILEELRGDEVVRSQRP-EESEPLEKKGKYE GPKAKPLNTS SKKWGSFFIDSVLGL 377
gi|530639256 VYFGDSMHSDFIPARHYSNWETVLILEELRGDEVVRSQRP-EESEPLEKKGKYE GPKAKPLNTS SKKWGSFFIDSVLGL 385
gi|543344792 VYFGDSMHSDFIPARHYSNWETVLILEELRGDEVVRSQRP-EESEPLEKKGKYE GPKAKPLNTS SKKWGSFFIDSVLGL 386
gi|542164235 VYFGDSMHSDFIPARHYSNWETVLILEELRGDEVVRSQRP-EESEPLEKKGKYE GPKAKPLNTS SKKWGSFFIDSVLGL 386
gi|363732051 VYFGDSMHSDFIPARHYSNWETVLILEELRGDEVVRSQRP-EESEPLEKKGKYE GPKAKPLNTS SKKWGSFFIDSVLGL 386
gi|683891145 VYFGDSMHSDFIPARHYSNWETVLILEELRGDEVVRSQRP-EESEPLEKKGKYE GPKAKPLNTS SKKWGSFFIDSVLGL 386
gi|543344789 VYFGDSMHSDFIPARHYSNWETVLILEELRGDEVVRSQRP-EESEPLEKKGKYE GPKAKPLNTS SKKWGSFFIDSVLGL 385
gi|449497791 VYFGDSMHSDFIPAHYSNWETVLILEELRGDEVVRSQRP-EESEPLEKKGKYE GPKAKPLNTS SKKWGSFFIDSVLGL 385
gi|542164233 VYFGDSMHSDFIPARHYSNWETVLILEELRGDEVVRSQRP-EESEPLEKKGKYE GPKAKPLNTS SKKWGSFFIDSVLGL 385
gi|50744564 VYFGDSMHSDFIPARHYSNWETVLILEELRGDEVVRSQRP-EESEPLEKKGKYE GPKAKPLNTS SKKWGSFFIDSVLGL 385
gi|729750329 VYFGDSMHSDFIPARHYSNWETVLILEELRGDEVVRSQRP-EESEPLEKKGKYE GPKAKPLNTS SKKWGSFFIDSVLGL 385
gi|768365056 VYFGDSMHSDFIPARHYSNWETVLILEELRGDEVVRSQRP-EESEPLEKKGKYE GPKAKPLNTS SKKWGSFFIDSVLGL 385
.....330.....340.....350.....360.....370.....380.....390.....400

```

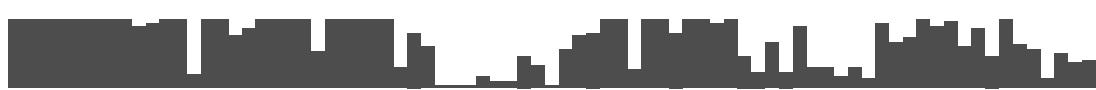

```

      . : . * : *          : : : :
lcl|Query_37229 NTEDSLVYTWCKRISTYSTIAIPSEIAIAELPLDYKFFTRFSSNSKTAGYYPNPPLVLS---DETLISK-- 455
gi|114608985 NTEDSLVYTWCKRISTYSTIAIPSEIAIAELPLDYKFFTRFSSNSKTAGYYPNPPLVLS---DETLISK-- 455
gi|426354317 NTEDSLVYTWCKRISTYSTIAIPSEIAIAELPLDYKFFTRFSSNSKTAGYYPNPPLVLS---DETLISK-- 455
gi|795513538 NTEDSLVYTWCKRISTYSTIAIPSEIAIAELPLDYKFFTRFSSNSKTAGYYPNPPLVLS---DETLISK-- 455
gi|387763464 NTEDSLVYTWCKRISTYSTIAIPSEIAIAELPLDYKFFTRFSSNSKTAGYYPNPPLVLS---DETLISK-- 455
gi|795549508 NTEDSLVYTWCKRISTYSTIAIPSEIAIAELPLDYKFFTRFSSNSKTAGYYPNPPLVLS---DETLISK-- 455
gi|795513542 NTEDSLVYTWCKRISTYSTIAIPSEIAIAELPLDYKFFTRFSSNSKTAGYYPNPPLVLS---DETLISK-- 454
gi|544424790 NTEDSLVYTWCKRISTYSTIAIPSEIAIAELPLDYKFFTRFSSNSKTAGYYPNPPLVLS---DETLISK-- 454
gi|724807254 NTEDSFVYTWCKRISTYSTIAIPSEIAIAELPLDYKFFTRFSSNSKTAGYYPNPPLVLS---DETLISK-- 455
gi|795130302 NTEDSLVYTWCKRISTYSTIAIPSEIAIAELPLDYKFFTRFSSNSKTAGYYPNPPLVLS---DETLIPK-- 455
gi|817291021 NTEDSLVYTWCKRISTYSTIAIPSEIAIAELPLDYKFFTRFSSNSKTAGYYPNPPLVLS---DDTLITK-- 455
gi|296199057 NTEDSLVYTWCKRISTYSTIAIPSEIAIAELPLDYKFFTRFSSNSKTAGYYPNPPLALS---DDILITK-- 455
gi|724807257 NTEDSFVYTWCKRISTYSTIAIPSEIAIAELPLDYKFFTRFSSNSKTAGYYPNPPLVLS---DETLISK-- 454
gi|403295527 NTEDSLVYTWCKRISTYSTIAIPSEIAIAELPLDYKFFTRFSSNSKTAGYYPNPPLVLS---DDTLITK-- 455
gi|817291023 NTEDSLVYTWCKRISTYSTIAIPSEIAIAELPLDYKFFTRFSSNSKTAGYYPNPPLVLS---DDTLITK-- 454
gi|675654011 NTEDSLVYTWCKRISTYSTIAIPSEIAIAELPLDYKFFTRFSSNSKTAGYYPNPPLALS---DDILITK-- 454
gi|725594041 NTEDSLVYTWCKRISTYSTIAIPSEIAIAELPLDYKFFTRFSSNSKTAGYYPNPPLVLS---DDTLITK-- 454
gi|829988711 NTEDSLVYTWCKRISTYSTIAIPSEIAIAELPLDYKFFTRFSSNSKTAGYYPNPPLVLSN---DETLITK-- 455
gi|395816322 NTEDSLVFTWFKRVGTYSTIAIPSEIAIAELPLDYKFFTRFSSNSKTAGYYPKPPPLVLSN---DEMLKTK-- 455
gi|826310252 NTEDSLVYTWCKRISTYSTIAIPSEIAIAELPLDYKFFTRFSSNSKTAGYYPNPPLVL-----IK-- 448
gi|410959884 NTEDSLFYTWCKRISTYSTIAIPSEIAIAELPLDYKFFSRFSSNSKTAGYYPNPPSILSN---NETLTAK-- 452
gi|585164297 NTEDSLVYTWCKRISTYSTIAIPSEIAIAELPLDYKFFSRFSSNSKTAGYYPNPPLILSN---NETLITK-- 452
gi|586987268 NTEDSLFYTWCKRISTYSTIAIPSEIAIAELPLDYKFFSRFSSNSKTAGYYPNPPSILSN---NETLTAK-- 451
gi|472356764 NTEDSLVYTWCKRISTYSTIAIPSEIAIAELPLDYKFFSRFSSNSKTAGYYPNPPLILTN---NETLTK-- 452
gi|602685616 NTEDSLVYTWCKRISTYSTIAIPSEIAIAELPLDYKFFTSFSSNSKTAGYYPNPPLVLSN---DGKLTTK-- 452
gi|667279819 NTEDSLVCTWTKRISTYSTIAIPSEIAIAELPLDHKFFTRFSSNSKTSGYYPNPPLVLSN---NETLITK-- 451
gi|667279822 NTEDSLVCTWTKRISTYSTIAIPSEIAIAELPLDHKFFTRFSSNSKTSGYYPNPPLVLSN---NETLITK-- 450
gi|465979262 NTEDSLIYTWCKRISTYSTIAIPSEIAIAELPLDYKFFTSFSSNSKTAGYYPNPPLVLSN---DGKLTTK-- 452
gi|194035204 NTEDSLVYTWCKRISTYSTIAIPSEIAIAELPLDYKFFTRFSSNSKTAGYYPNPPLVLLN---DGLMTAK-- 452
gi|759133407 NTEDSLVYTWCKRISTYSTIAIPSEIAIAELPLDYKFFTRFSSNSKMGYYPNPPLVLSN---VETRTTK-- 452
gi|641734335 NTEDSLVSTWCKRISTYSTIAIPSEIAIAELPLDYKFFTRFSSNSKTAGYYPNPPLALS---FETLTNK-- 452
gi|511930642 NTEDSLFYTWCKRISTYSTIAIPSEIAIAELPLDYKFFSRFSSSSKTAGYYPNPPLILSN---NETLITK-- 452
gi|744561719 NTEDSLVYTWCKRISTYSTIVIPSEIAIAELPLDYKFFTRFSSNSKTAGYYPNPPLVLS---DGLMTTK-- 451
gi|558121862 NTEDSLVSTWCKRISTYSTIAIPSEIAIAELPLDYKFFTRFSSNSKTAGYYPNPPLALS---FETLTNK-- 452
gi|478495911 NTEDSLVYTWCKRISTYSTIAIPSEIAIAELPLDYKFFTRFSSNSKTAGYYPNPPLVLSN---NETRTTK-- 452
gi|556739024 NREDSLVYTWCKRISTYSTIAIPSEIAIAELPLDYKFFTRFSSNSKTAGYYPNPPLVLSN---AGKLTAK-- 452
gi|655843044 NTGDSLVYTWSSKRINTYSTIAIPSEIAIAELPLDYKFFTRFSSNSKTAGYYP---LVH----- 440
gi|507925770 NKEDSLVYTWCKRISTYSTIAIPSELTIAELSDYKFFTRFSSNSKMGYYPNPPLVLSK---ETSKTK-- 451
gi|829980860 NKEDSLVYTWCKRISTYSTIAIPSELTIAELSDYKFFTRFSSNSKMGYYPNPPLVLSK---ETSKTK-- 450
gi|426234499 NREDSLVYTWCKRISTYSTIAIPSEIAIAELPLDYKFFTRFSSNSKTAGYYPNPPLVLSN---AGKLTAK-- 452
gi|157428094 NREDSLVYTWCKRISTYSTIAIPSEIAIAELPLDYKFFTRFSSNSKTAGYYPNPPLVLSN---AGKLTAK-- 452
gi|594063404 NREDSLVYTWCKRISTYSTIAIPSEIAIAELPLDYKFFTRFSSNSKTAGYYPNPPLVLSN---AGKLTAK-- 452
gi|803097535 NREDSLVYTWCKRISTYSTIAIPSEIAIAELPLDYKFFTRFSSNSKTAGYYPNPPLVLSN---AGKLTAK-- 451
gi|670997190 NTEDSLVYTWCKRISTYSTIAIPSEIAIAELPLDYKFFSRFSSNSKTAGYYPNPPLILSN---NETLITK-- 427
gi|548479506 NREDSLVYTWCKRISTYSTIAIPSEIAIAELPLDYKFFTRFSSNSKTAGYYPNPPLVLSN---AGKLTAK-- 452
gi|555991352 NREDSLVYTWCKRISTYSTIAIPSEIAIAELPLDYKFFTRFSSNSKTAGYYPNPPLVLSN---AGKLTAK-- 452
gi|528960483 NREDSLVYTWCKRISTYSTIAIPSEIAIAELPLDYKFFTRFSSNSKTAGYYPNPPLVLSN---AGKLTAK-- 451
gi|594063406 NREDSLVYTWCKRISTYSTIAIPSEIAIAELPLDYKFFTRFSSNSKTAGYYPNPPLVLSN---AGKLTAK-- 451
gi|548479508 NREDSLVYTWCKRISTYSTIAIPSEIAIAELPLDYKFFTRFSSNSKTAGYYPNPPLVLSN---AGKLTAK-- 451
gi|664701045 NTEDSLVYTWCKRISTYSTIAIPSEIAIAELPLDYKFFTRFSSNSKTAGYYPYPPVLSN---NEKLTTK-- 422
gi|820999445 NTEDSSVYTLSENKISTYSTIAIPSEIAISELPLDYKFFTRFSSSSKTAGYYP---FVHYT---NGLI--K-- 446
gi|554586740 NTEDSLVSTWCKRISTYSTIAIPSEIAIAELPLDYKFFTRFSSNSKTAGYYPNPVALSS---FETLTNK-- 437
gi|584073388 NTEDSLVSTWCKRISTYSTIAIPSEIAIAELPLDYKFFTRFSSNSKTAGYYPNPPLALS---FETLTNK-- 437
gi|558127235 NTEDSLVSTWCKRISTYSTIAIPSEIAIAELPLDYKFFTRFSSNSKTAGYYPNPPLALS---FETLTNK-- 437
gi|512920735 NTEDSLVYTWSSNKISTYSTIAIPSEIAIAELPLDYKFFTRFSSNSKTAGYYP---LVHYT---NGLI--K-- 447
gi|617593341 NTEDSLIHTWCKRVSTYSTIAIPSEIAIAELPLDHKFFTRFSANNSKTAGYYPHPPLVLLN---DAKLTTK-- 429
gi|674085287 NAEDSLVYTWSSKRISTYSTIAIPSEIAIAELPLDYKFFTRFSSNSKTAGYYPPLVHYGLGS----- 445
gi|820979643 NTEDSLVYTWCKRISTYSTIAIPSEIAIAELPLDYKFFTRFSSNSKTAGYYPNPPLVLS---DETLISK-- 391
gi|625280199 NAEDSLVYTWSSRRISTYSTIAIPSEIAIAELPLDYKFFTRFSTNSKTAGYYPVHYTYLSDTDSKIVFTEK 462
gi|532041477 NAEDSLVYTWSSRRISTYSTIAIPSEIAIAELPLDYKFFTRFSTNSKTAGYYPVHYTYLSDTDSKILTEK 463
gi|625280201 NAEDSLVYTWSSRRISTYSTIAIPSEIAIAELPLDYKFFTRFSTNSKTAGYYPVHYTYLSDTDSKIVFTEK 461
gi|672086605 NAEDSLVYTWSSKRISTYSTIAIPNIESIAELPLDYKFFTRFSANNSKTAGYYPVHYTYLSONTDSKIIIST-- 461
gi|110626010 RAEDSVYTWSSKRISTYSTIAIPNIESIAELPLDYKFFTRFSTNSKMGYYPVHHTLGSODTDSKIIISTEK 467
gi|524945211 NAEDSLVYTWSSRRISTYSTIAIPSEIAIAELPLDYKFFTRFSTNSKTAGYYPVHYTYLSDTDSKIIIFTEK 463
gi|568965457 RAEDSVYTWSSKRISTYSTIAIPNIESIAELPLDYKFFTRFSTNSKMGYYPVHHTLGSODTDSKIIISTEK 466
gi|672086607 NAEDSLVYTWSSKRISTYSTIAIPNIESIAELPLDYKFFTRFSANNSKTAGYYPVHYTYLSONTDSKIIIST-- 460
gi|675654013 -----KQLATIQHLHP-----YQVTTY----- 395
gi|530639256 SAETTLTNTWCKCISAYSTIAIPRLEAIAADLPLDYRFRFSSNSLETAGYYPKPPRALLS---NGEPVITK-- 454
gi|543344792 NAETTLVHTWCKCISTYSTIAIPSEIAIAADLPLDYRFRFSSNSLETAGYYPSPPRALLP---NEDSVMTK-- 455
gi|542164235 NAETTLVHTWCKCISTYSTIAIPSEIAIAADLPLDYRFRFSSNSLETAGYYPSPPRALLP---NEDSVMTK-- 455
gi|363732051 NAETTLVHTWCKCISTYSTIAIPSEIAIAADLPLDYRFRFSSNSLETAGYYPSPPRALLP---SEESVMTK-- 455
gi|683891145 NAETTLVHTWCKCISTYSTIAIPSEIAIAADLPLDYRFRFSSNSLETAGYYPSPPRALLP---NEDSVMTK-- 455
gi|543344789 NAETTLVHTWCKCISTYSTIAIPSEIAIAADLPLDYRFRFSSNSLETAGYYPSPPRALLP---NEDSVMTK-- 454
gi|449497791 NAETTLVHTWCKCISTYSTIAIPSEIAIAADLPLDYRFRFSSNSLETAGYYPSPPRALMP---NEDSVMTK-- 454
gi|542164233 NAETTLVHTWCKCISTYSTIAIPSEIAIAADLPLDYRFRFSSNSLETAGYYPSPPRALLP---NEDSVMTK-- 454
gi|50744564 NAETTLVHTWCKCISTYSTIAIPSEIAIAADLPLDYRFRFSSNSLETAGYYPSPPRALLP---SEESVMTK-- 454
gi|729750329 NAETTLVHTWCKCISTYSTIAIPSEIAIAADLPLDYRFRFSSNSLETAGYYPSPPRALLP---NEDSVMTK-- 454
gi|768365056 NAETTLVHTWCKCISTYSTIAIPSEIAIAADLPLDYRFRFSSNSLETAGYYPSPPRALLP---NEDSVMTK-- 454
.....410.....420.....430.....440.....450.....460.....470...

```

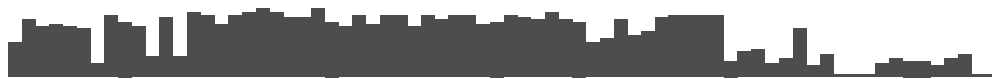

Supplement: tp2016196x11.pdf [file tp2016196x11.pdf]
