# Supplementary material for: Exome chip analyses in adult attention deficit hyperactivity disorder
Source: PubMed Central journal article supplement (PMC5315553; doi:10.1038/tp.2016.196), 2016-10-18

**Supplementary Figure 1. QQ plots of single point association tests of each dataset individually as well as meta-analysis of common variants (MAF $\geq$ 1%).**

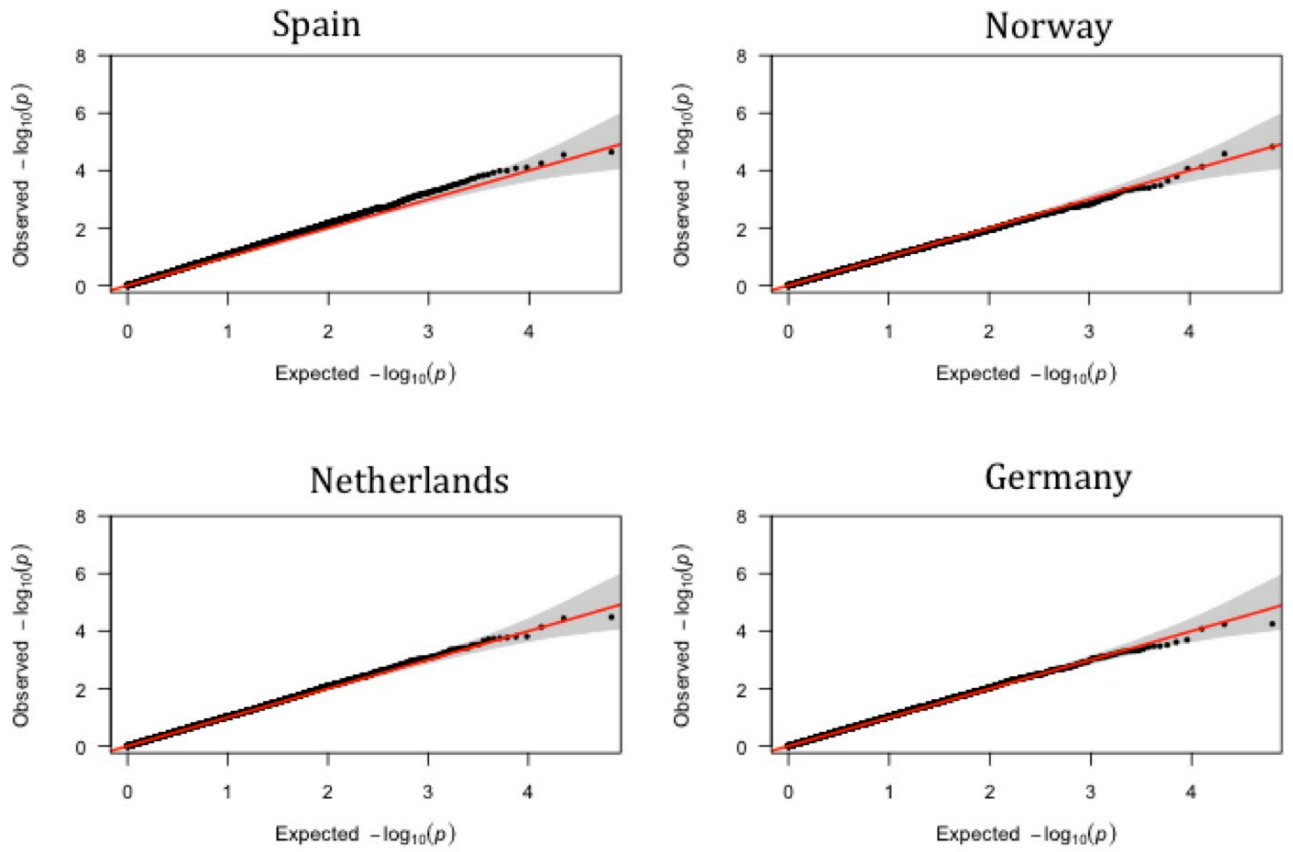

Inverse variance fixed effects meta-analysis in METAL

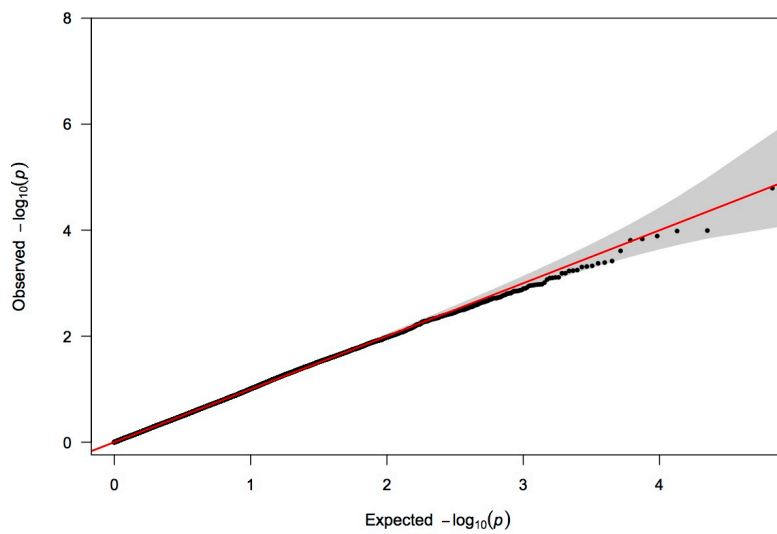

Supplement: tp2016196x8.pdf [file tp2016196x8.pdf]
