# Supplementary material for: Exome chip analyses in adult attention deficit hyperactivity disorder
Source: PubMed Central journal article supplement (PMC5315553; doi:10.1038/tp.2016.196), 2016-10-18

**Supplementary Figure 2. Forest plots reflecting the overall meta-analysis (discovery and replication datasets together) for the most significant top three common SNVs observed in this study.**

A) rs9325032 (*PPP2R2B* gene)

Association p-value= 3.97225588935779e-06  
Heterogeneity p-value= 0.0417366770248054

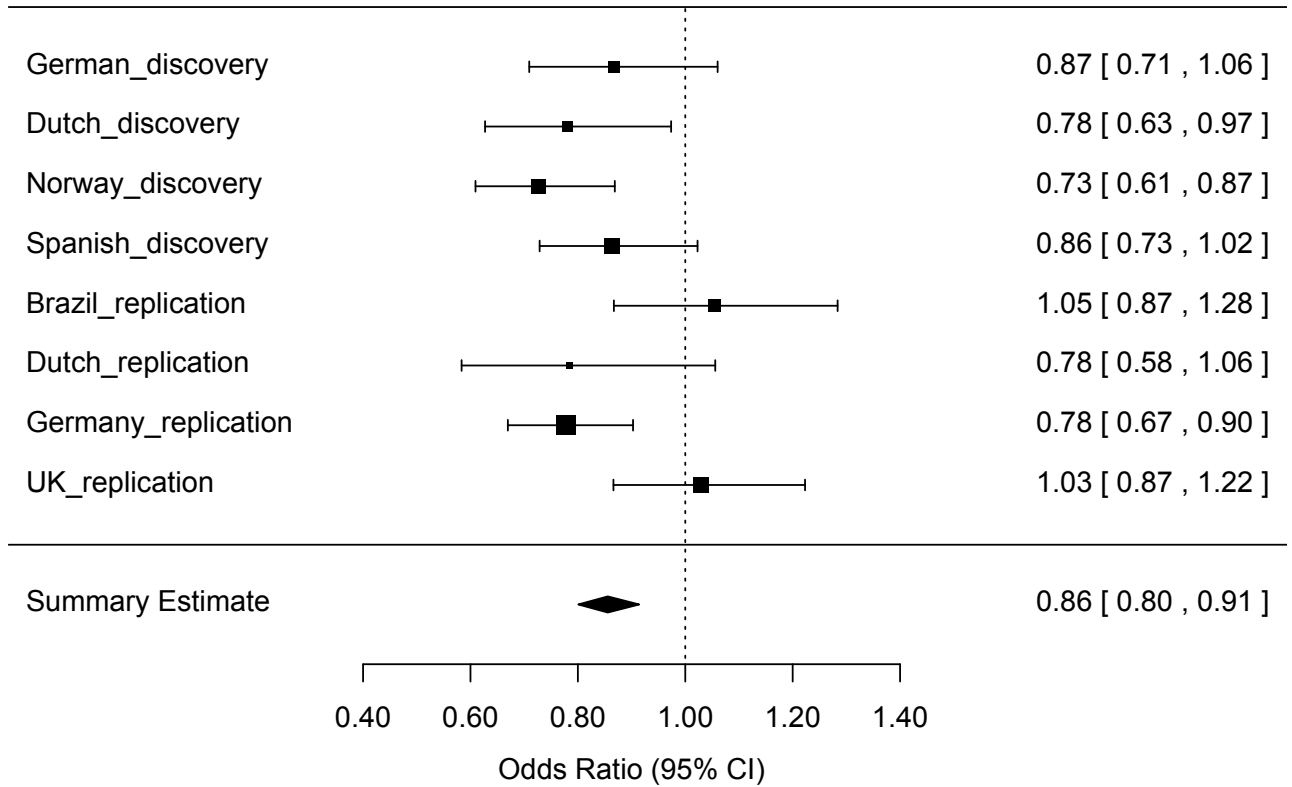

B) rs3095150 (intergenic)

Association p-value= 0.000392603313280398

Heterogeneity p-value= 0.177227509705407

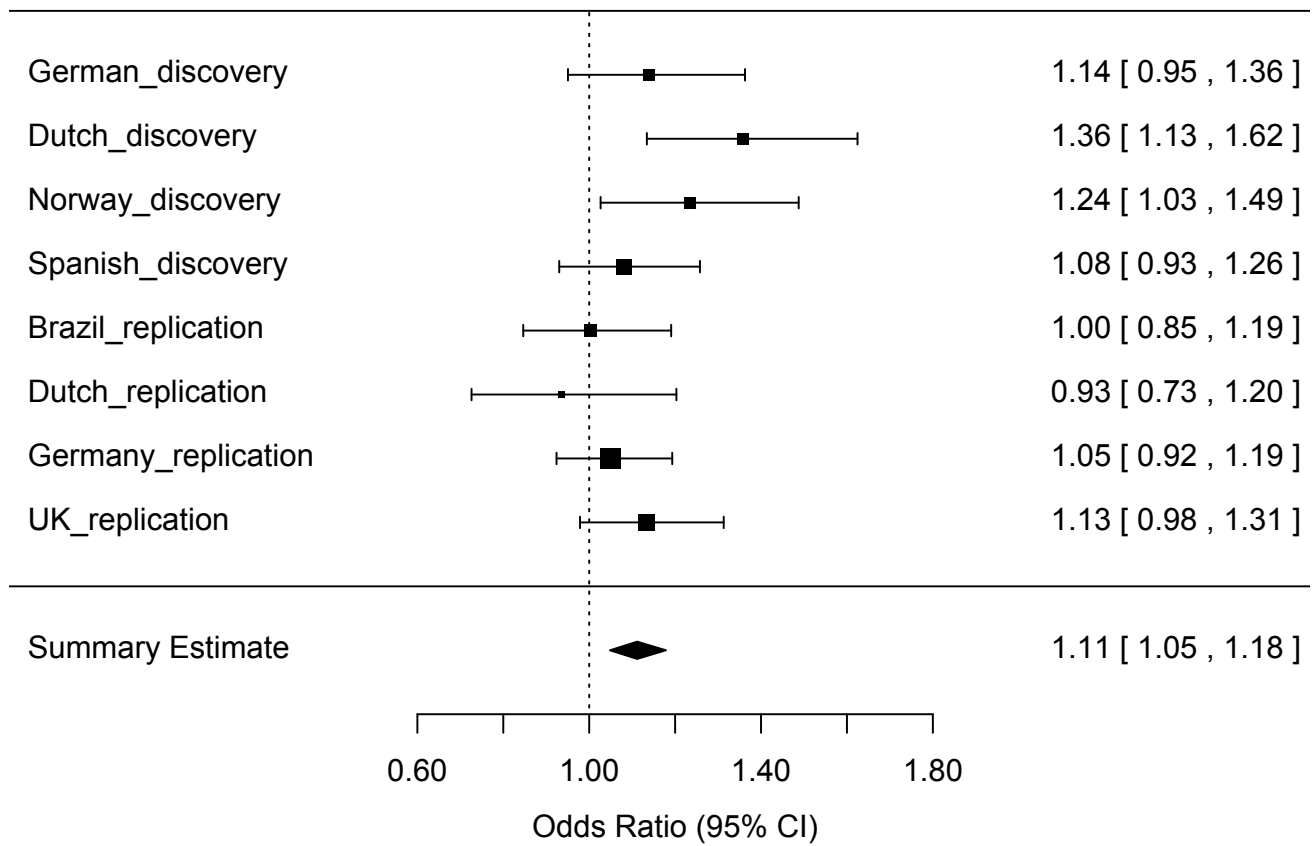

C) rs117611723 (*SYNRG* gene)

Association p-value= 7.98034831517963e-05

Heterogeneity p-value= 0.757078085736703

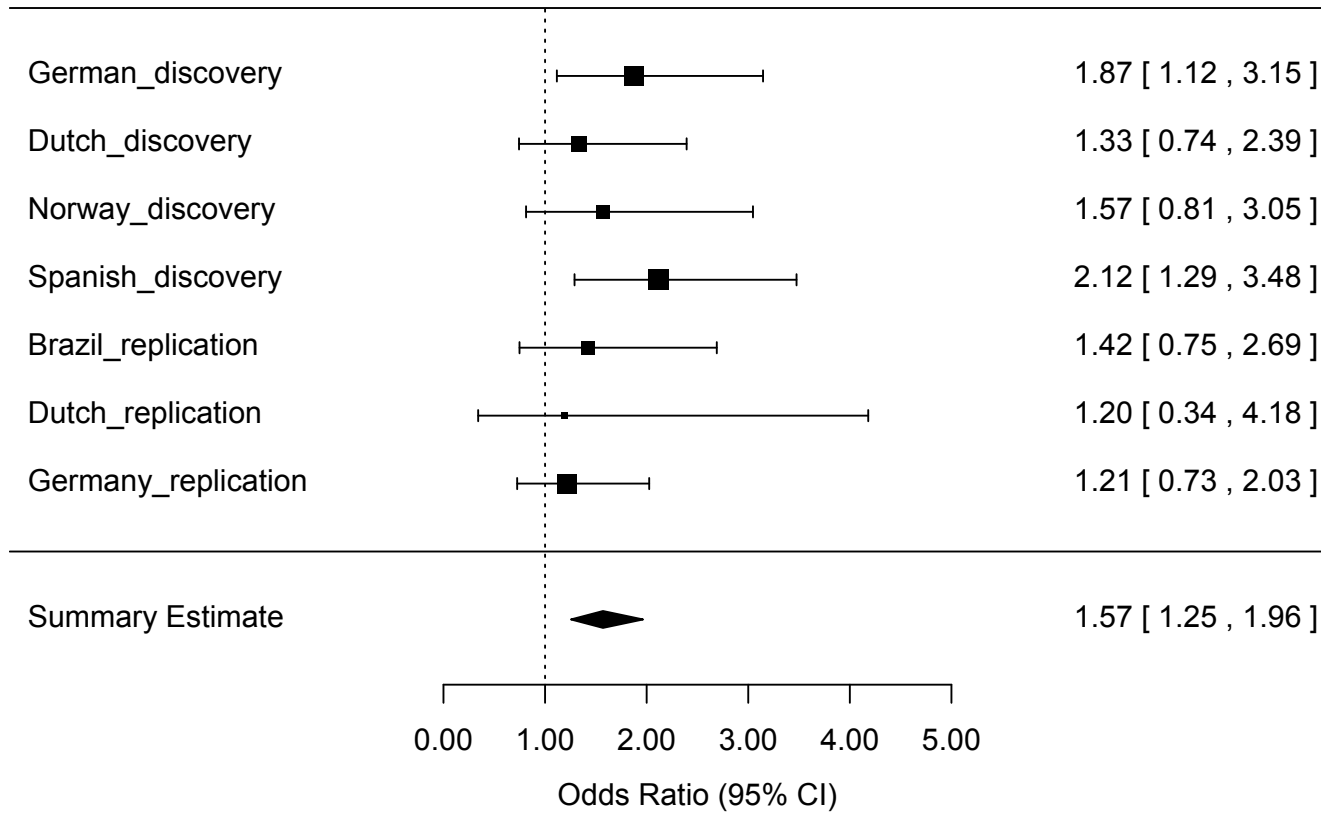

Supplement: tp2016196x9.pdf [file tp2016196x9.pdf]
