# Supplementary material for: Exome chip analyses in adult attention deficit hyperactivity disorder
Source: PubMed Central journal article supplement (PMC5315553; doi:10.1038/tp.2016.196), 2016-10-18

**Supplementary Figure 5. Plots of the four loci reaching study-wide significance in gene-based analyses of rare SNVs (MAF<1%).**

Chromosomal details of four study-wide significant loci.

A) 6q22.1 locus

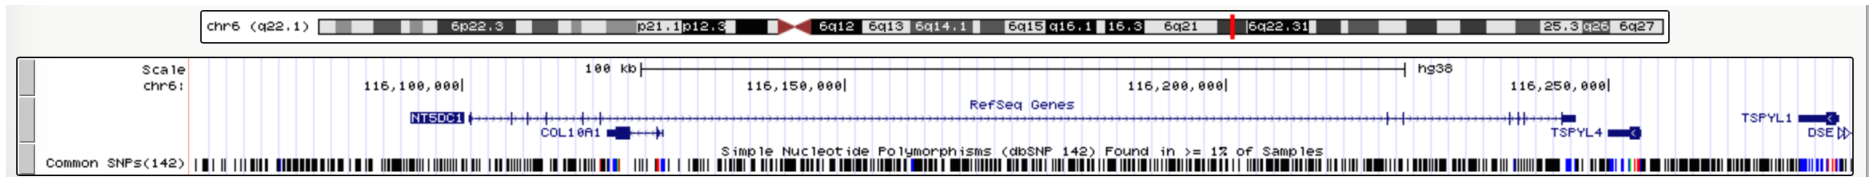

B) PSD locus

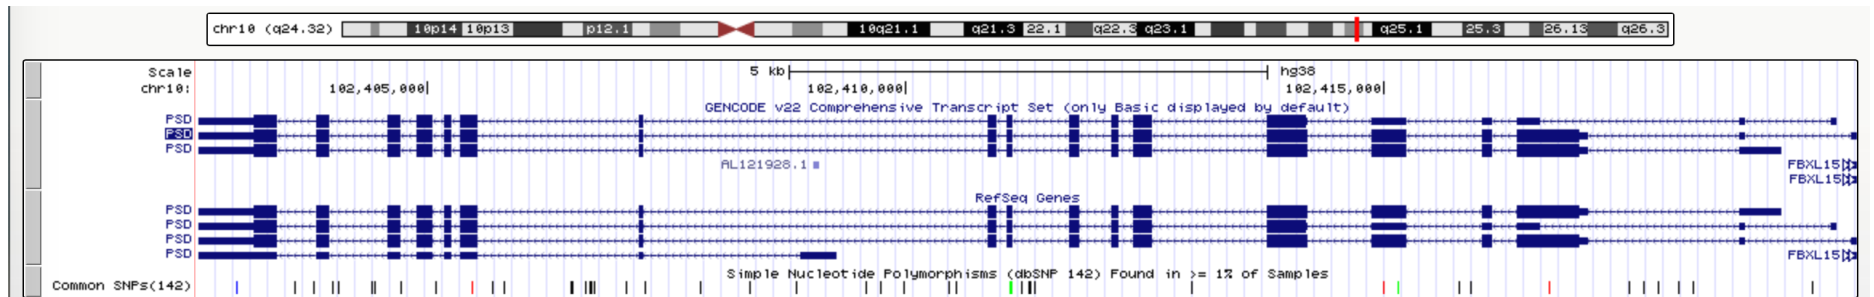

C) SEC23IP locus

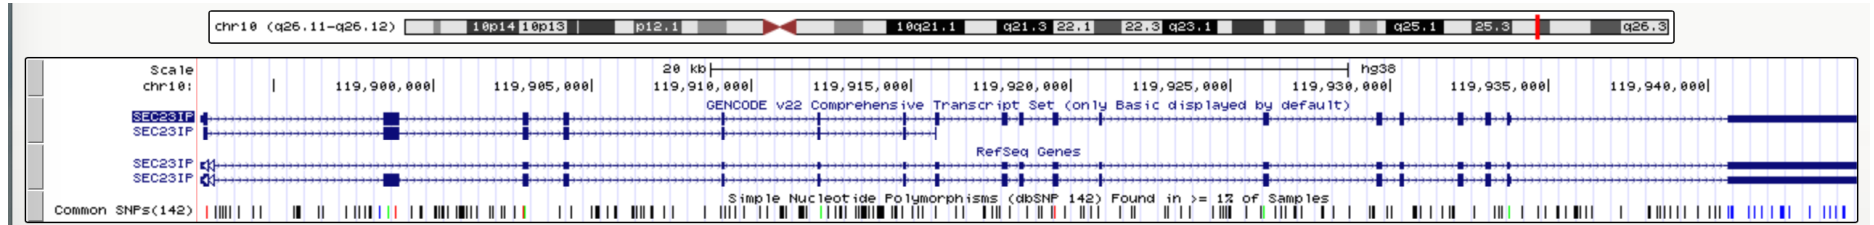

D) ZCCHC4

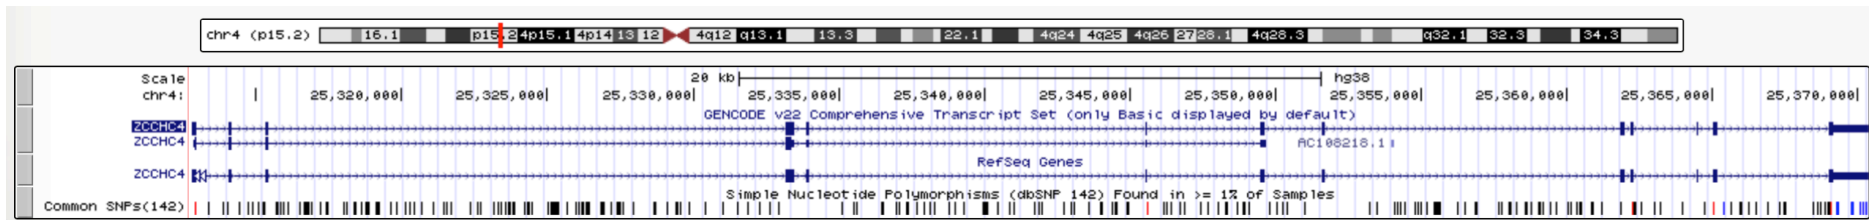

Supplement: tp2016196x12.pdf [file tp2016196x12.pdf]
