# Supplementary material for: Exome chip analyses in adult attention deficit hyperactivity disorder
Source: PubMed Central journal article supplement (PMC5315553; doi:10.1038/tp.2016.196), 2016-10-18

**Supplementary Figure 6. Differential expression of the study-wide significant loci in the human brain across the lifetime.**

Developmental age is shown on the x axes, in days. Brain regions are abbreviated as follows: NCX, neocortex; STR, striatum; HIP, hippocampus; MD, mediodorsal nucleus of the thalamus; AMY, amygdala; CBC, cerebellar cortex.

A) NT5DC1

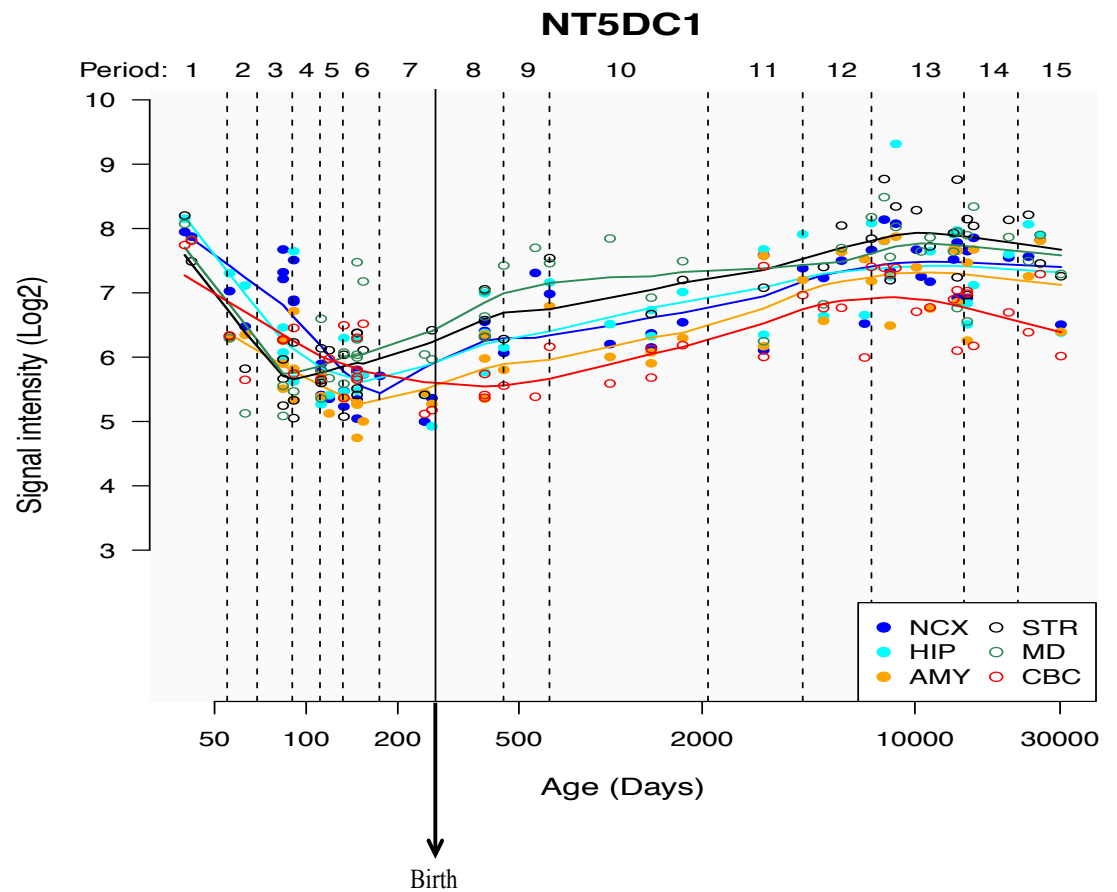

B) SEC23IP

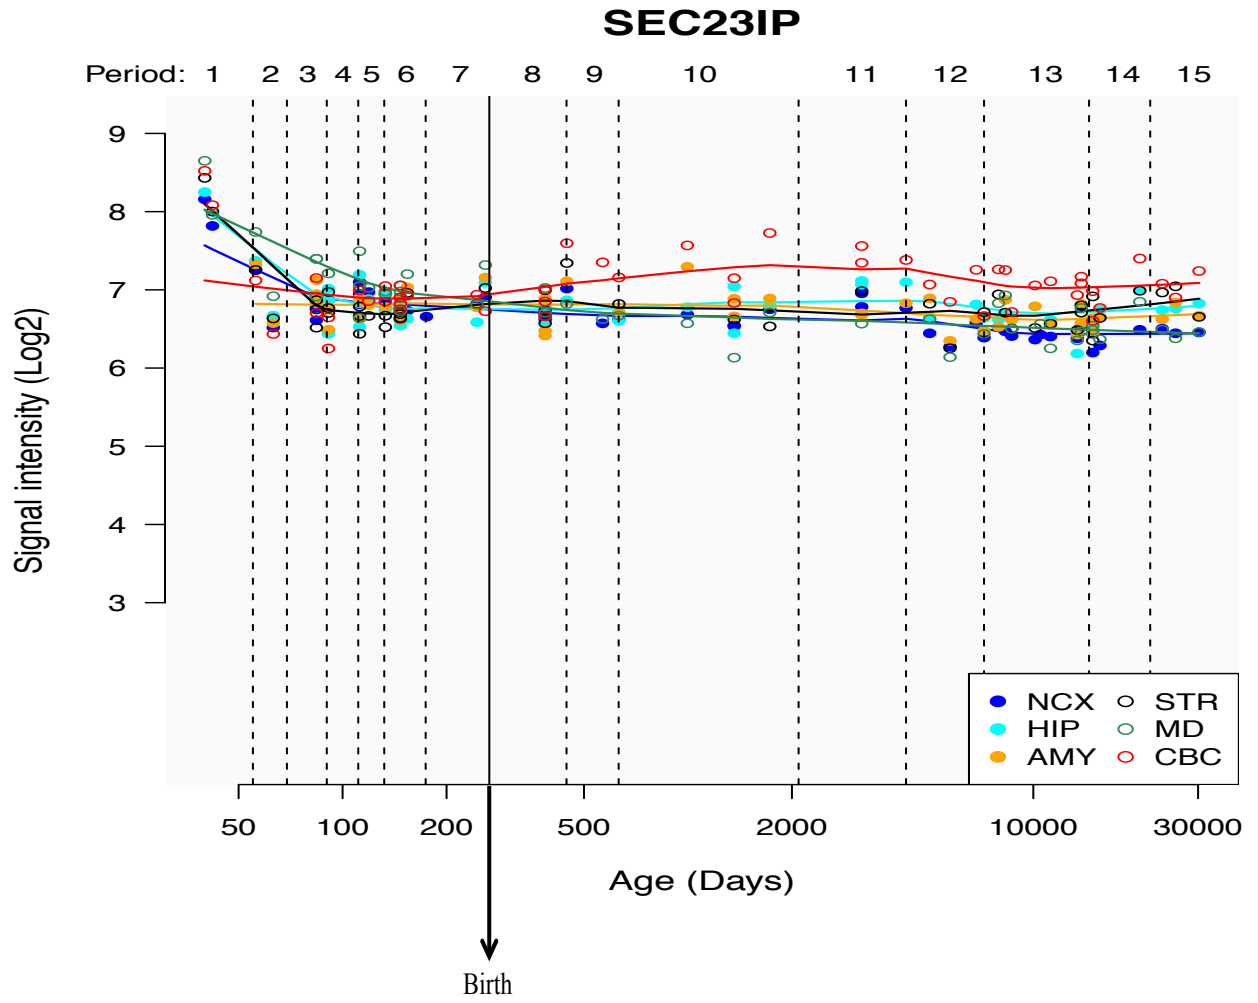

C) PSD

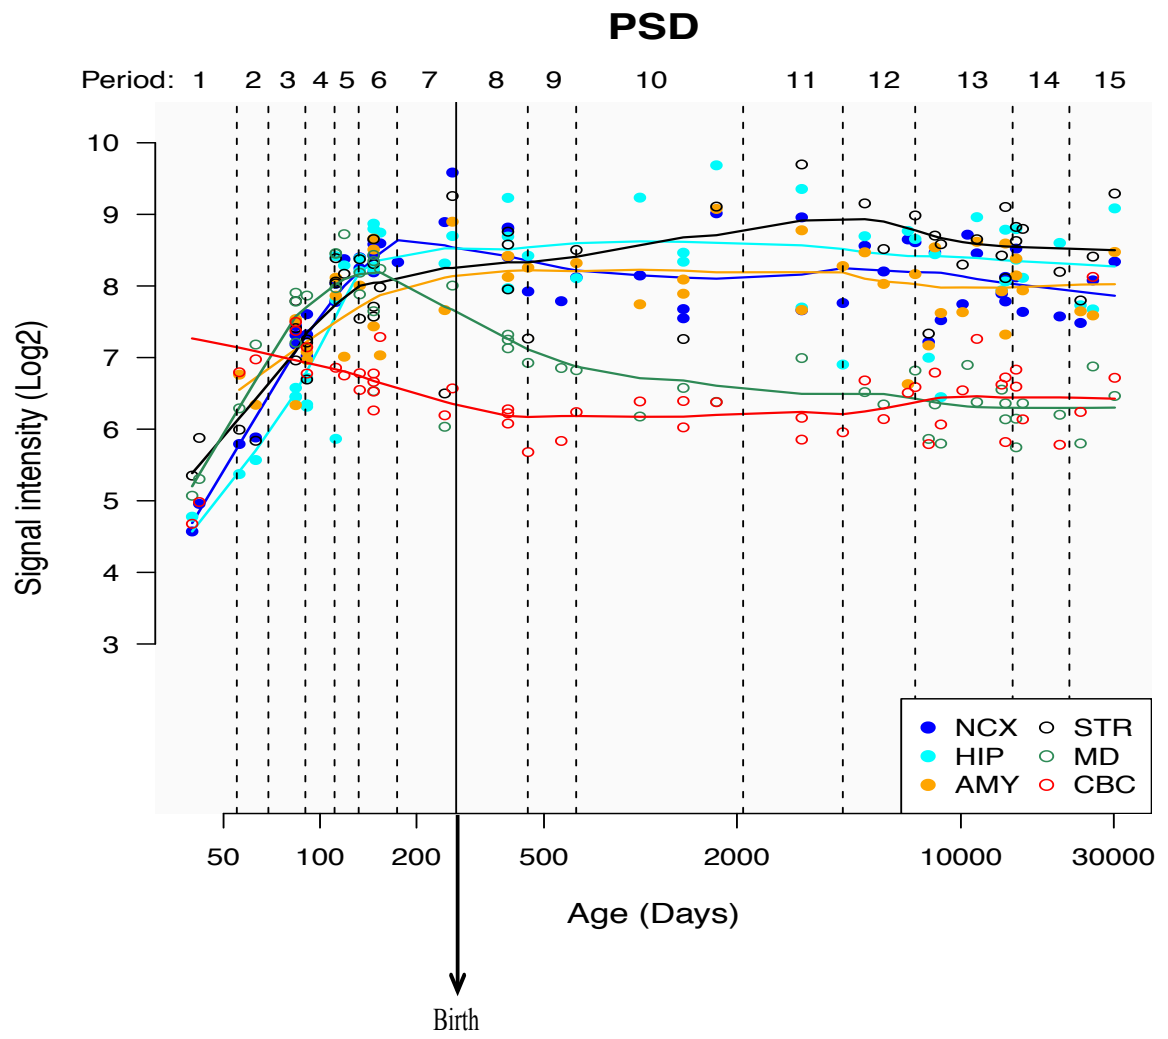

D) ZCCHC4

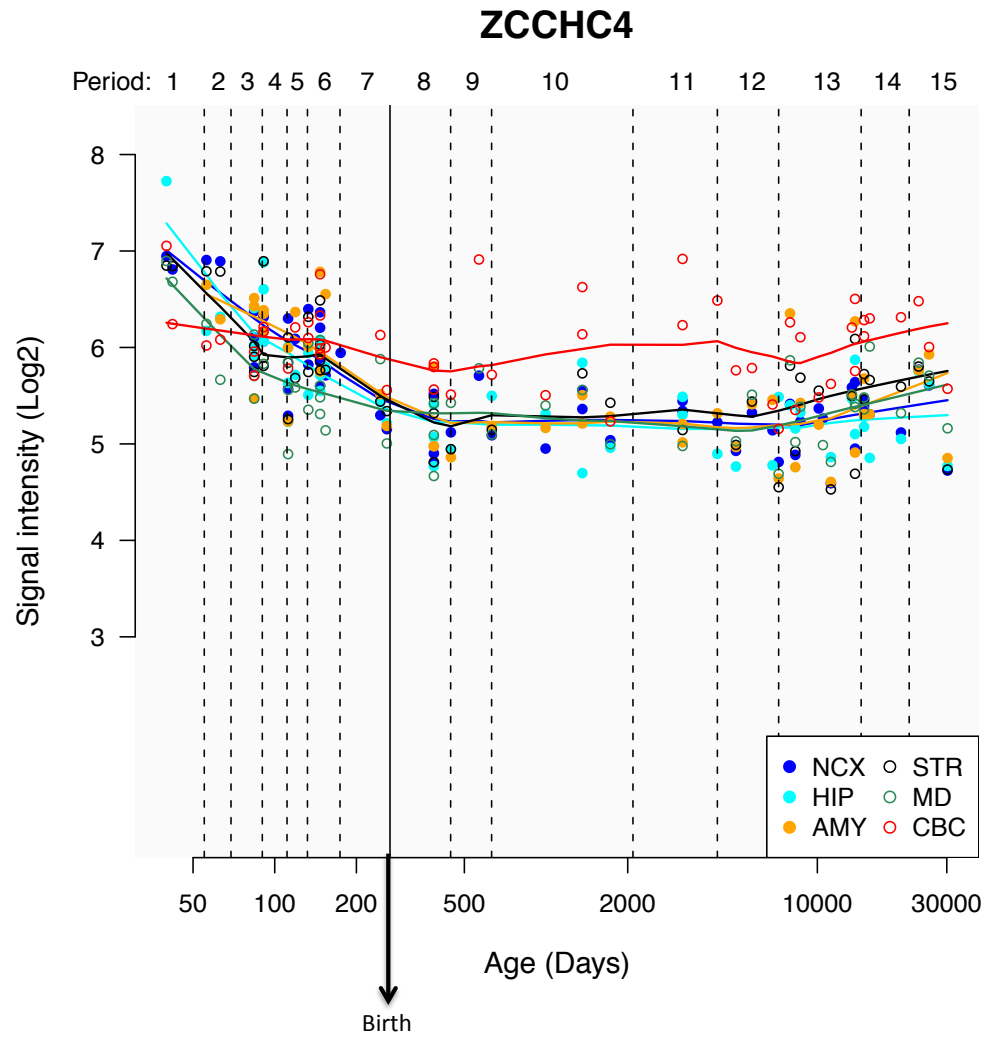

Supplement: tp2016196x13.pdf [file tp2016196x13.pdf]
